# Supplementary material for: Synthesis and P-glycoprotein induction activity of colupulone analogs
Source: Royal Society of Chemistry journal article supplement (doi:10.1039/c5ob00554j), 2015-01-01

## **Electronic Supporting Information (ESI)**

### **Synthesis and P-glycoprotein induction activity of colupulone analogs**

**Jaideep B. Bharate,<sup>a,b</sup> Yazan S. Batarseh,<sup>c</sup> Abubakar Wani,<sup>d</sup> Sadhana Sharma,<sup>b,d</sup> Ram A.  
Vishwakarma,<sup>a,b</sup> Amal Kaddoumi,<sup>\*,c</sup> Ajay Kumar,<sup>d,\*</sup> and Sandip B. Bharate<sup>a,b,\*</sup>**

<sup>a</sup>Medicinal Chemistry Division, CSIR-Indian Institute of Integrative Medicine (CSIR), Canal Road, Jammu-180001, India; Fax: +91-191-2586333; Tel: +91-191-2585006; \*E-mail: [sbharate@iiim.ac.in](mailto:sbharate@iiim.ac.in) (SBB).

<sup>b</sup>Academy of Scientific & Innovative Research (AcSIR), CSIR-Indian Institute of Integrative Medicine, Canal Road, Jammu-180001, India

<sup>c</sup>School of Pharmacy, The University of Louisiana at Monroe, USA. E-mail: [kaddoumi@ulm.edu](mailto:kaddoumi@ulm.edu) (AK).

<sup>d</sup>Cancer Pharmacology Division, CSIR-Indian Institute of Integrative Medicine, Canal Road, Jammu-180001, India. E-mail: [ajaykmahajan@hotmail.com](mailto:ajaykmahajan@hotmail.com) (AK).

## CONTENTS

| Sr.No.           | Title                                                                                                                                                                         | Page no. |
|------------------|-------------------------------------------------------------------------------------------------------------------------------------------------------------------------------|----------|
| <b>S1 and S2</b> | <b>Spectral data scans of all compounds</b>                                                                                                                                   | S4-S57   |
| S1.a.            | <sup>1</sup> H, <sup>13</sup> C and DEPT-135 NMR spectrum of 1-acetyl-2,4,6-trihydroxy benzene ( <b>2a</b> )                                                                  | S4       |
| S1.b.            | <sup>1</sup> H, <sup>13</sup> C and DEPT-135 NMR spectrum of 1-isobutanoyl)-2,4,6-trihydroxy benzene ( <b>2b</b> )                                                            | S6       |
| S1.c.            | <sup>1</sup> H, <sup>13</sup> C and DEPT-135 NMR spectrum of 1-(3-methyl-butanoyl)-2,4,6-trihydroxy benzene ( <b>2c</b> )                                                     | S8       |
| S1.d.            | <sup>1</sup> H, <sup>13</sup> C and DEPT-135 NMR spectrum of 4-acetyl-2,2,6,6-tetraallyl-5-hydroxycyclohex-4-ene-1,3-dione ( <b>3a</b> )                                      | S10      |
| S1.e.            | <sup>1</sup> H, <sup>13</sup> C and DEPT-135 NMR spectrum of 4-acetyl-5-hydroxy-2,2,6,6-tetra(prop-2-ynyl)cyclohex-4-ene-1,3-dione ( <b>3b</b> )                              | S12      |
| S1.f.            | <sup>1</sup> H, <sup>13</sup> C and DEPT-135 NMR spectrum of 4-acetyl-5-hydroxy-2,2,6,6-tetrakis(3-methylbut-2-enyl)cyclohex-4-ene-1,3-dione ( <b>3c</b> )                    | S14      |
| S1.g.            | <sup>1</sup> H, <sup>13</sup> C and DEPT-135 NMR spectrum of 5-hydroxy-4-(isobutyryl)-2,2,6,6-tetramethylcyclohex-4-ene-1,3-dione ( <b>3d</b> )                               | S16      |
| S1.h.            | <sup>1</sup> H, <sup>13</sup> C and DEPT-135 NMR spectrum of 2,2,6,6-tetraallyl-5-hydroxy-4-(isobutyryl)cyclohex-4-ene-1,3-dione ( <b>3e</b> )                                | S18      |
| S1.i.            | <sup>1</sup> H, <sup>13</sup> C and DEPT-135 NMR spectrum of 5-hydroxy-4-(isobutyryl)-2,2,6,6-tetra(prop-2-ynyl)cyclohex-4-ene-1,3-dione ( <b>3f</b> )                        | S20      |
| S1.j.            | <sup>1</sup> H, <sup>13</sup> C and DEPT-135 NMR spectrum of 5-hydroxy-4-isobutyryl-2,2,6,6-tetrakis(3-methylbut-2-en-1-yl)cyclohex-4-ene-1,3-dione ( <b>3g</b> )             | S22      |
| S1.k.            | <sup>1</sup> H, <sup>13</sup> C and DEPT-135 NMR spectrum of 5-hydroxy-4-(isobutyryl)-2,2,6,6-tetrakis((E)-3,7-dimethylocta-2,6-dienyl)cyclohex-4-ene-1,3-dione ( <b>3h</b> ) | S24      |
| S1.l.            | <sup>1</sup> H, <sup>13</sup> C and DEPT-135 NMR spectrum of 4-(3-methylbutanoyl)-5-hydroxy-2,2,6,6-tetramethylcyclohex-4-ene-1,3-dione ( <b>3i</b> )                         | S26      |
| S1.m.            | <sup>1</sup> H, <sup>13</sup> C and DEPT-135 NMR spectrum of 4-(3-methylbutanoyl)-2,2,6,6-tetraallyl-5-hydroxycyclohex-4-ene-1,3-dione ( <b>3j</b> )                          | S28      |
| S1.n.            | <sup>1</sup> H, <sup>13</sup> C and DEPT-135 NMR spectrum of 4-(3-methylbutanoyl)-5-hydroxy-2,2,6,6-tetrakis(3-methylbut-2-enyl)cyclohex-4-ene-1,3-dione ( <b>3k</b> )        | S30      |
| S1.o.            | <sup>1</sup> H, <sup>13</sup> C and DEPT-135 NMR spectrum of 1,3-diacetyl -2,4,6-trihydroxy benzene ( <b>4a</b> )                                                             | S32      |
| S1.p.            | <sup>1</sup> H, <sup>13</sup> C and DEPT-135 NMR spectrum of 1,3-dipropanoyl-2,4,6-trihydroxy benzene ( <b>4b</b> )                                                           | S34      |
| S1.q.            | <sup>1</sup> H, <sup>13</sup> C and DEPT-135 NMR spectrum of 1,3-di-(3-Methyl-butanoyl)-2,4,6-trihydroxy benzene ( <b>4c</b> )                                                | S36      |
| S1.r.            | <sup>1</sup> H, <sup>13</sup> C and DEPT-135 NMR spectrum of 2,6-diacetyl-3,5-dihydroxy-4,4-dimethylcyclohexa-2,5-dienone ( <b>5a</b> )                                       | S38      |
| S1.s.            | <sup>1</sup> H, <sup>13</sup> C and DEPT-135 NMR spectrum of 2,6-diacetyl-4,4-diallyl-3,5-dihydroxycyclohexa-2,5-dienone ( <b>5b</b> )                                        | S40      |
| S1.t.            | <sup>1</sup> H, <sup>13</sup> C and DEPT-135 NMR spectrum of 2,6-diacetyl-3,5-dihydroxy-4,4-bis(3-methylbut-2-enyl)cyclohexa-2,5-dienone ( <b>5c</b> )                        | S42      |

|              |                                                                                                                                                                                  |     |
|--------------|----------------------------------------------------------------------------------------------------------------------------------------------------------------------------------|-----|
| S1.u.        | <sup>1</sup> H, <sup>13</sup> C and DEPT-135 NMR spectrum of 3,5-dihydroxy-4,4-dimethyl-2,6-dipropionylcyclohexa-2,5-dienone ( <b>5d</b> )                                       | S44 |
| S1.v.        | <sup>1</sup> H, <sup>13</sup> C and DEPT-135 NMR spectrum of 4,4-diallyl-3,5-dihydroxy-2,6-dipropionylcyclohexa-2,5-dienone ( <b>5e</b> )                                        | S46 |
| S1.w.        | <sup>1</sup> H, <sup>13</sup> C and DEPT-135 NMR spectrum of 3,5-dihydroxy-4,4-bis(3-methylbut-2-enyl)-2,6-dipropionylcyclohexa-2,5-dienone ( <b>5f</b> )                        | S48 |
| S1.x.        | <sup>1</sup> H, <sup>13</sup> C and DEPT-135 NMR spectrum of 1,1'-(4,6-dihydroxy-5,5-dimethyl-2-oxocyclohexa-3,6-diene-1,3-diyl)bis(3-methylbutan-1-one) ( <b>5g</b> )           | S50 |
| S1.y.        | <sup>1</sup> H, <sup>13</sup> C and DEPT-135 NMR spectrum of 2,6-bis(3-methylbutanoyl)-4,4-diallyl-3,5-dihydroxycyclohexa-2,5-dienone ( <b>5h</b> )                              | S52 |
| S1.z.        | <sup>1</sup> H, <sup>13</sup> C and DEPT-135 NMR spectrum of 2,6-bis(3-methylbutanoyl)-3,5-dihydroxy-4,4-bis(3-methylbut-2-enyl)cyclohexa-2,5-dienone ( <b>5i</b> )              | S54 |
| <b>S2.a.</b> | <sup>1</sup> H, <sup>13</sup> C and DEPT-135 NMR spectrum of 2,6-bis(3-methylbutanoyl)-3,5-dihydroxy-4,4-bis((E)-3,7-dimethylocta-2,6-dienyl)cyclohexa-2,5-dienone ( <b>5j</b> ) | S57 |

## S.1. SPECTRAL DATA SCANS OF ALL COMPOUNDS

S1.a.  $^1\text{H}$ ,  $^{13}\text{C}$  and DEPT-135 NMR spectrum of 1-acetyl-2,4,6-trihydroxy benzene (**2a**)

### $^1\text{H}$ NMR

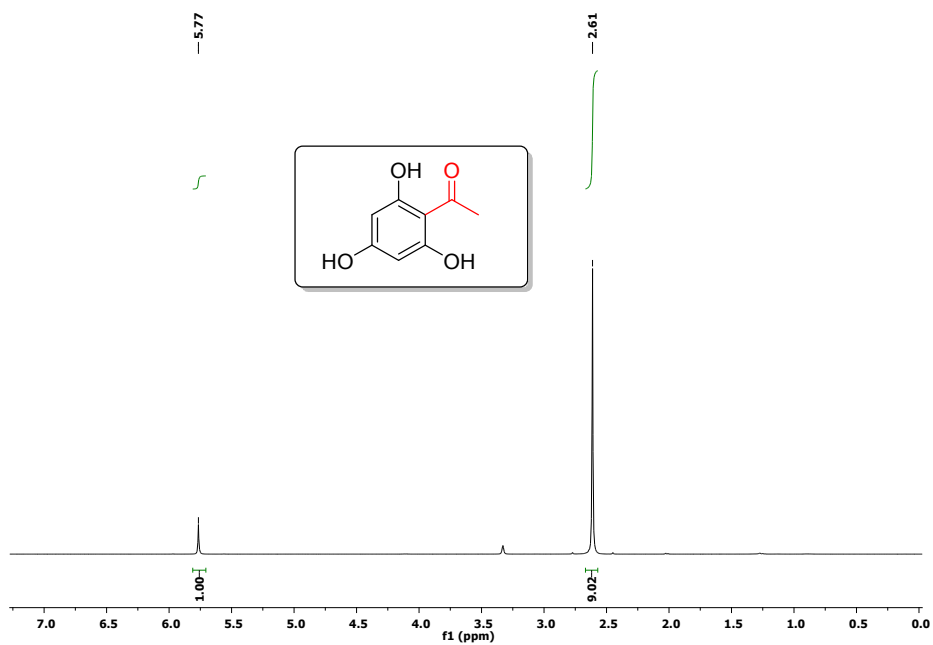

### $^{13}\text{C}$ NMR

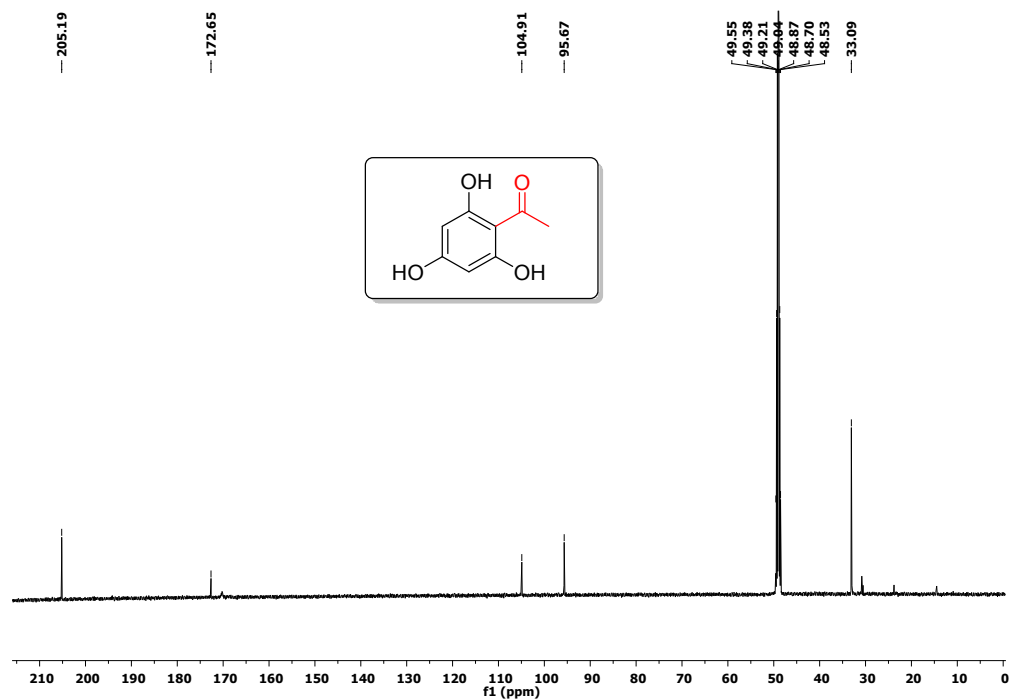

# DEPT

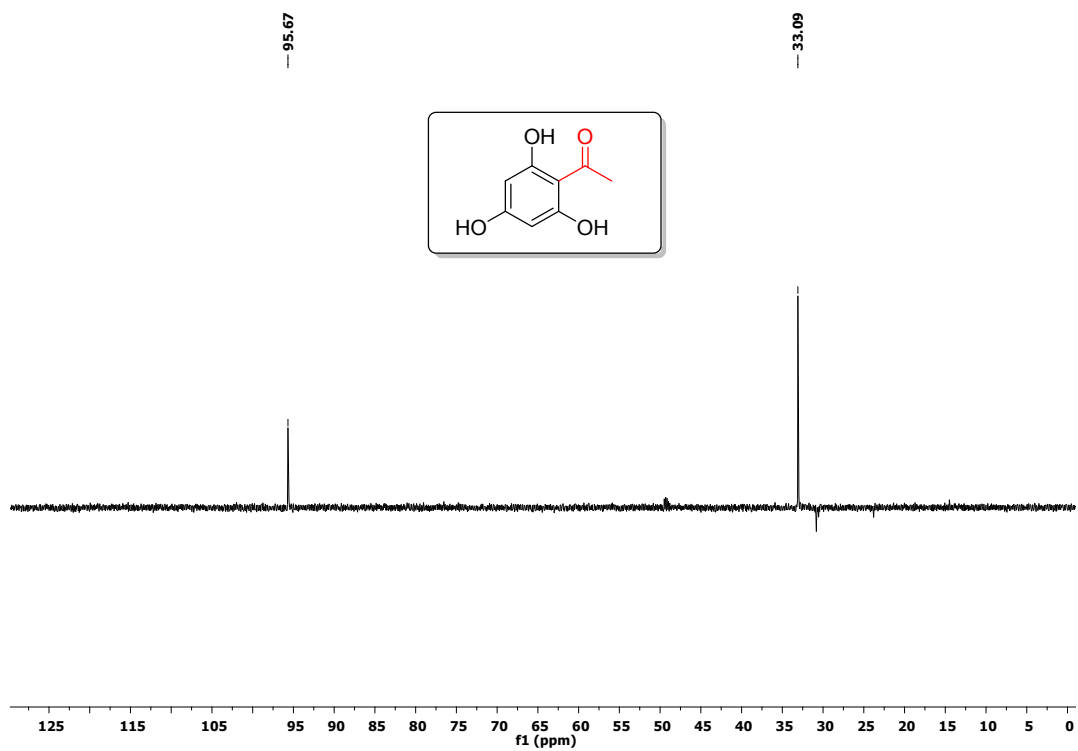

S1.b.  $^1\text{H}$ ,  $^{13}\text{C}$  and DEPT-135 NMR spectrum of 1-isobutanoyl)-2,4,6-trihydroxy benzene (**2b**)

$^1\text{H}$  NMR

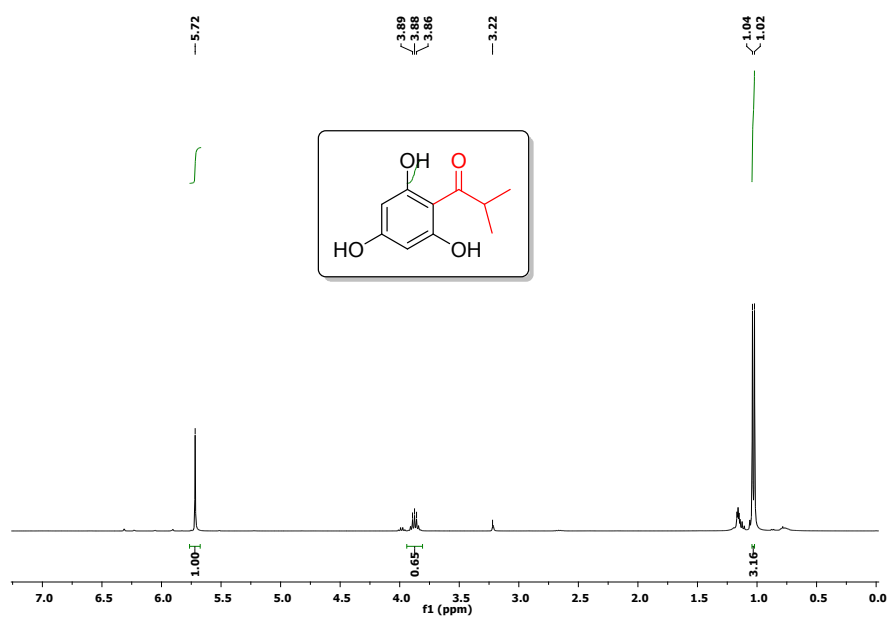

$^{13}\text{C}$  NMR

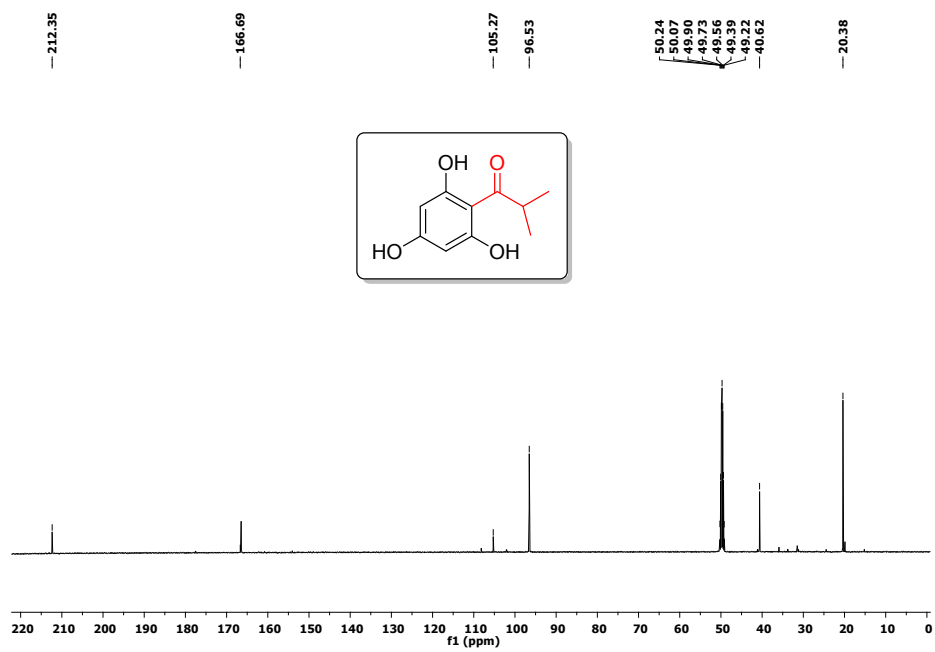

# DEPT

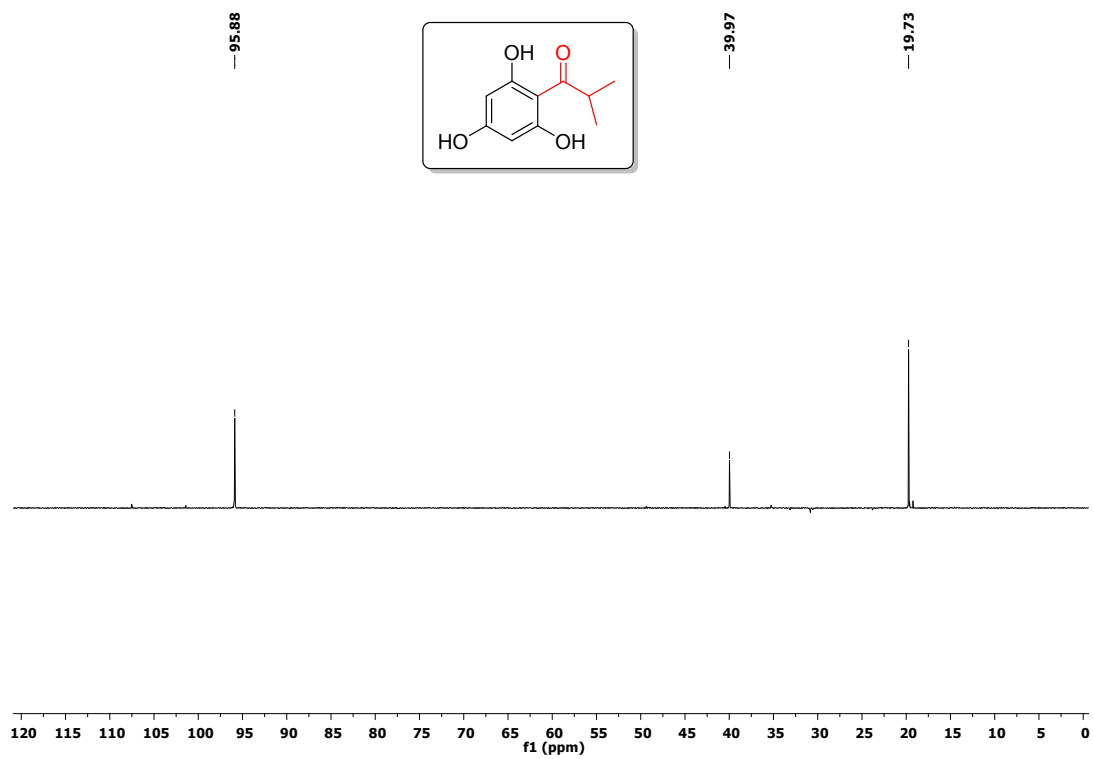

S1.c.  $^1\text{H}$ ,  $^{13}\text{C}$  and DEPT-135 NMR spectrum of 1-(3-methyl-butanoyl)-2,4,6-trihydroxy benzene (2c)

$^1\text{H}$  NMR

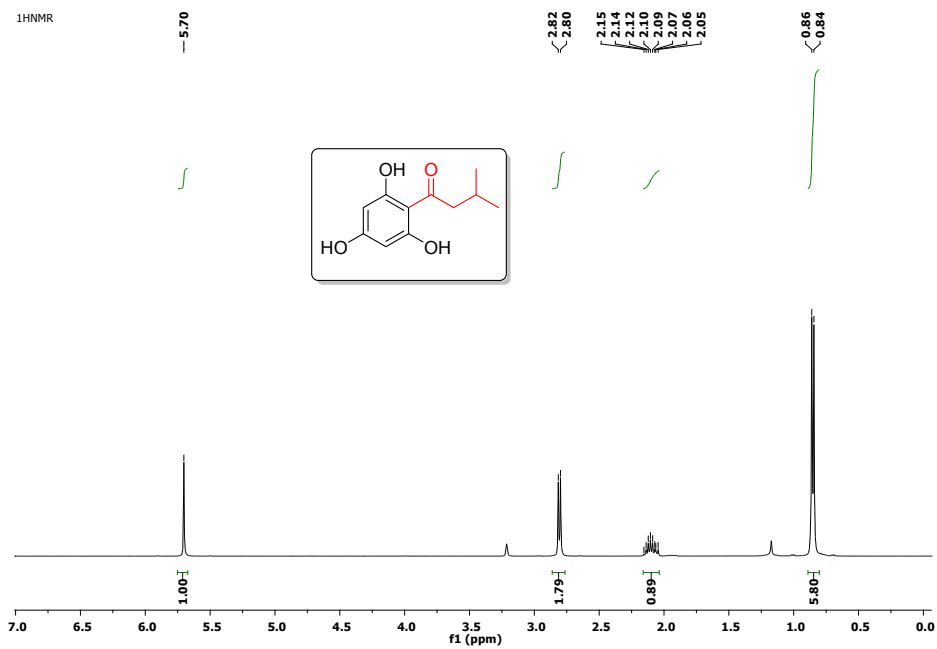

$^{13}\text{C}$  NMR

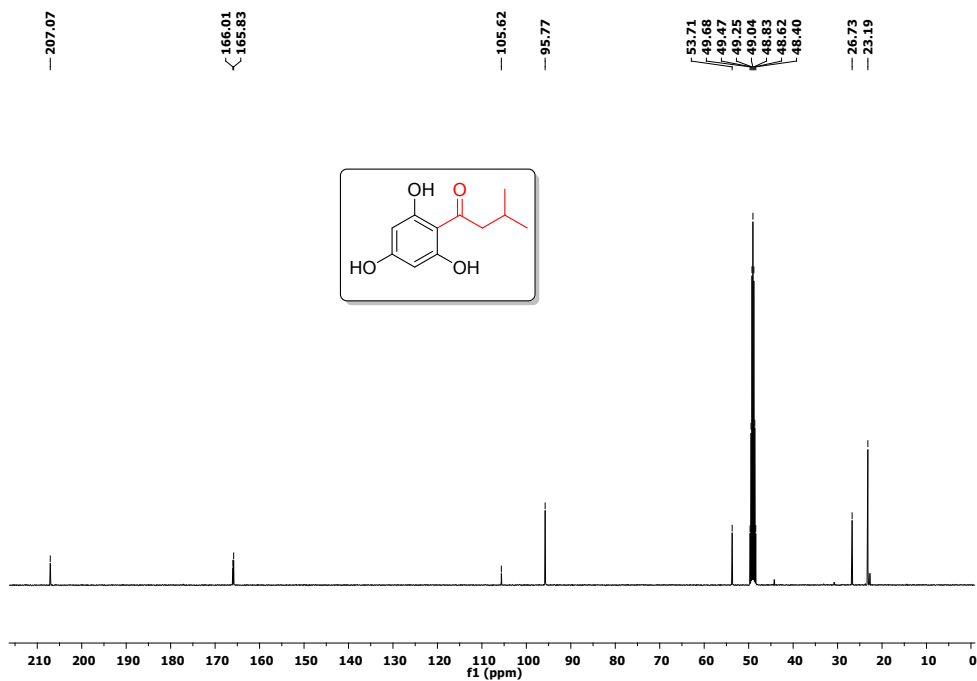



# DEPT

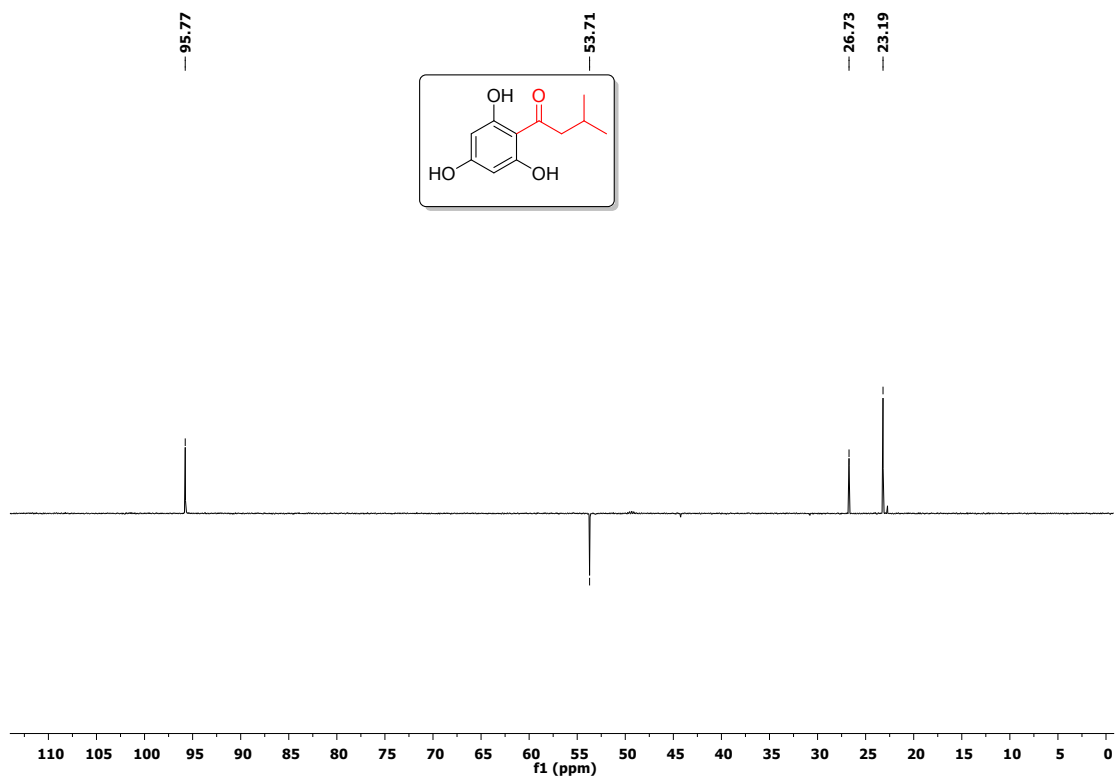

**S1.d.**  $^1\text{H}$ ,  $^{13}\text{C}$  and DEPT-135 NMR spectrum of 4-acetyl-2,2,6,6-tetraallyl-5-hydroxycyclohex-4-ene-1,3-dione: (**3a**)

**$^1\text{H}$ NMR**

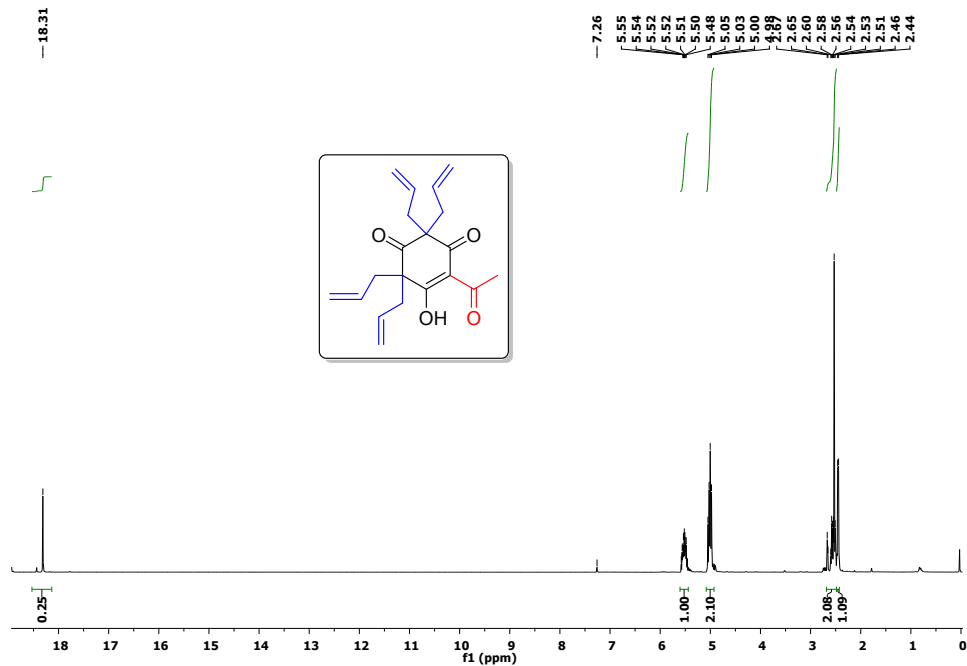

**$^{13}\text{C}$  NMR**

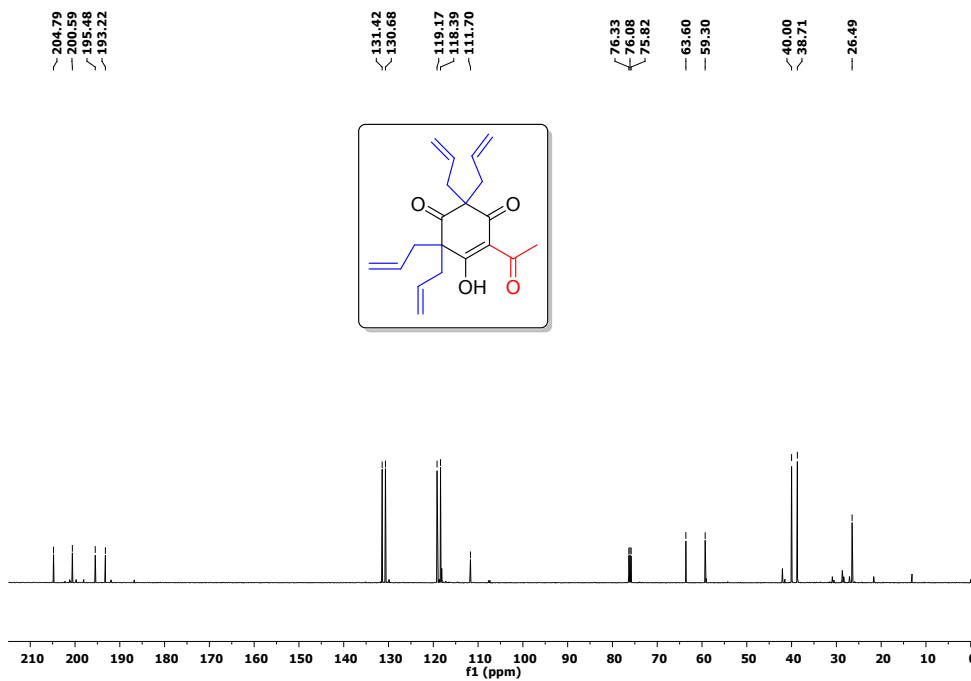

# DEPT

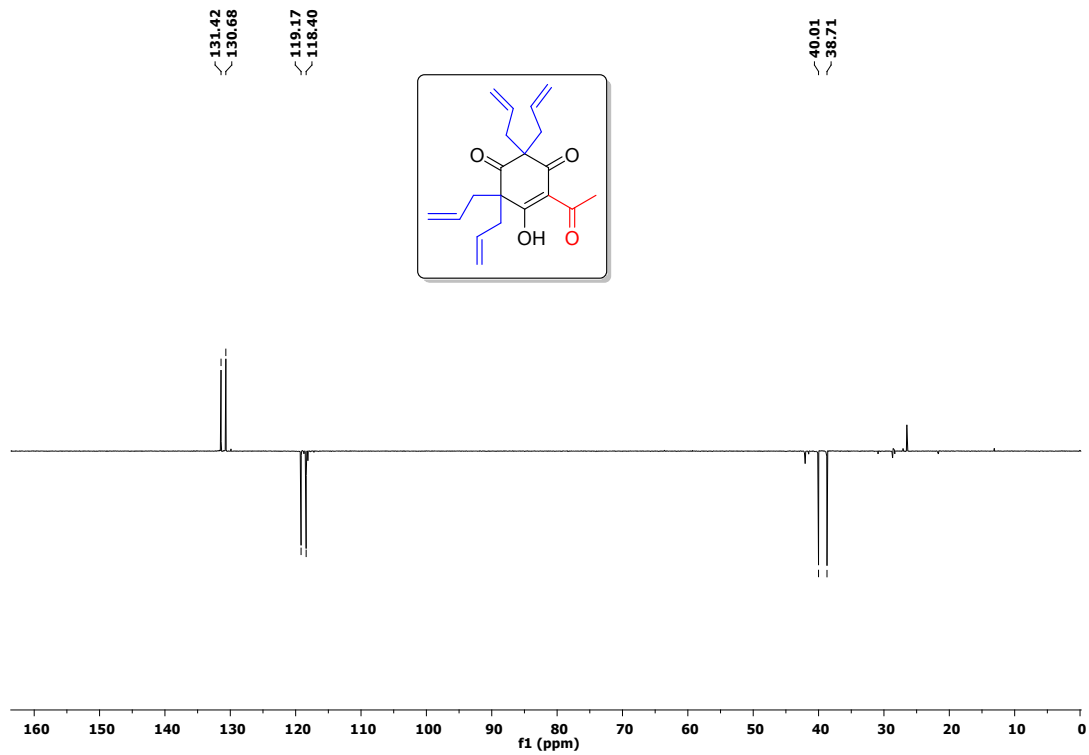

**S1.e.**  $^1\text{H}$ ,  $^{13}\text{C}$  and DEPT-135 NMR spectrum of 4-acetyl-5-hydroxy-2,2,6,6-tetra(prop-2-ynyl)cyclohex-4-ene-1,3-dione (**3b**)

### $^1\text{H}$ NMR

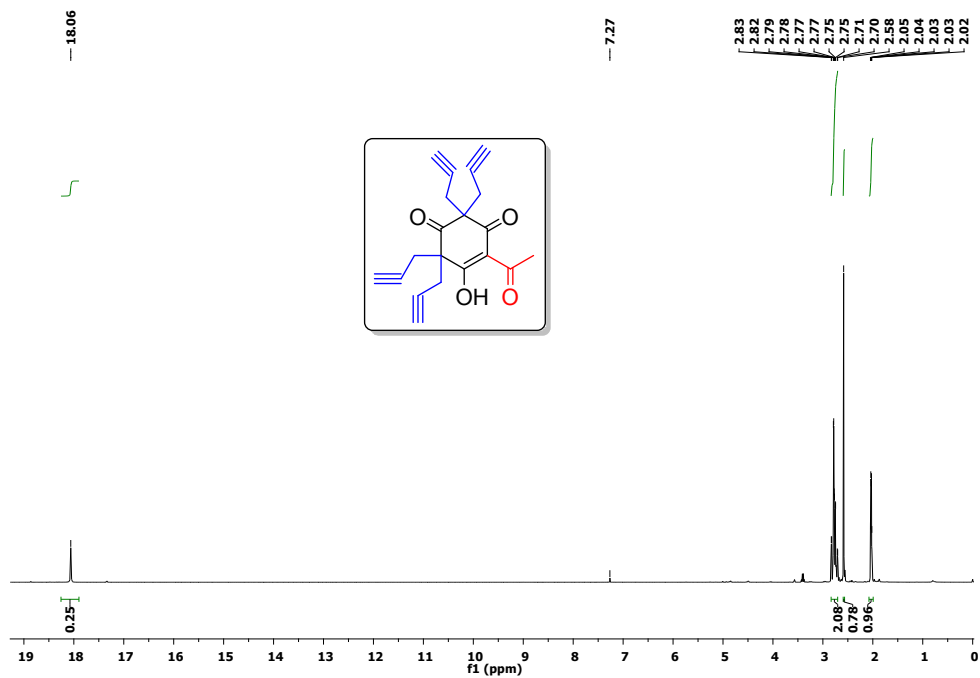

### $^{13}\text{C}$ NMR

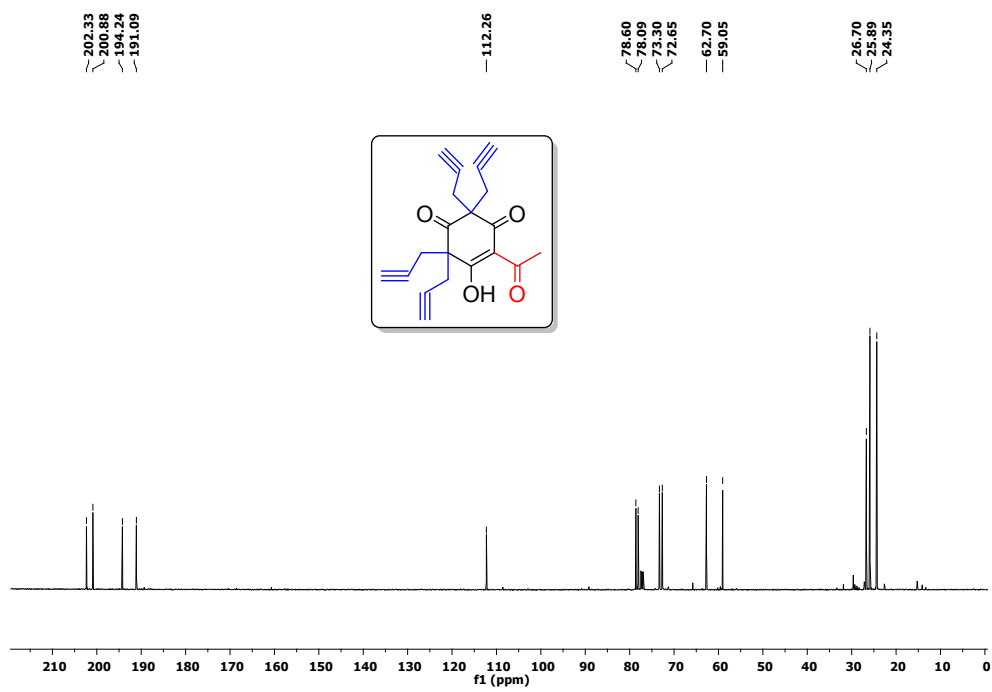

# DEPT

78.60  
78.09

73.31  
72.63

26.70  
25.89  
24.35

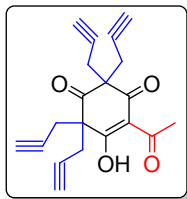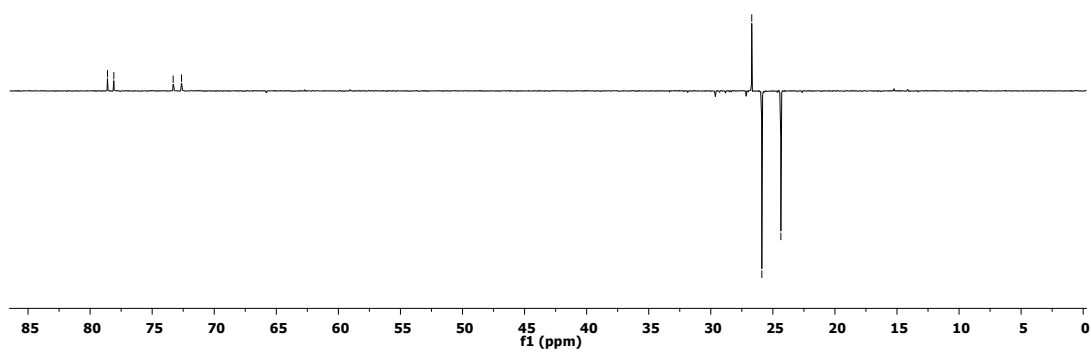

**S1.f.**  $^1\text{H}$ ,  $^{13}\text{C}$  and DEPT-135 NMR spectrum of 4-acetyl-5-hydroxy-2,2,6,6-tetrakis(3-methylbut-2-enyl)cyclohex-4-ene-1,3-dione (**3c**)

**$^1\text{H}$  NMR**

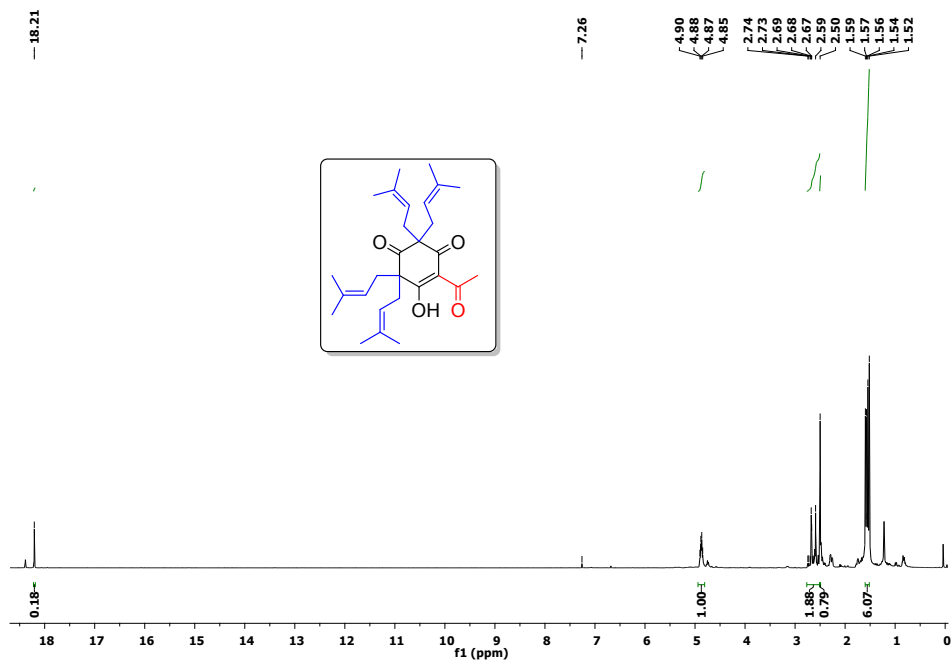

**$^{13}\text{C}$  NMR**

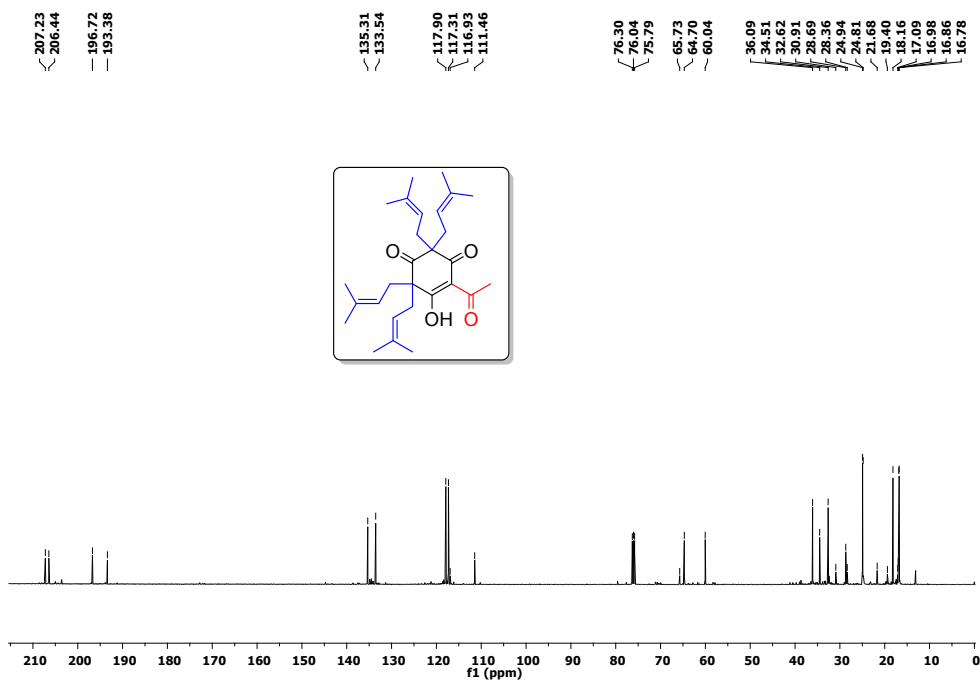

# DEPT

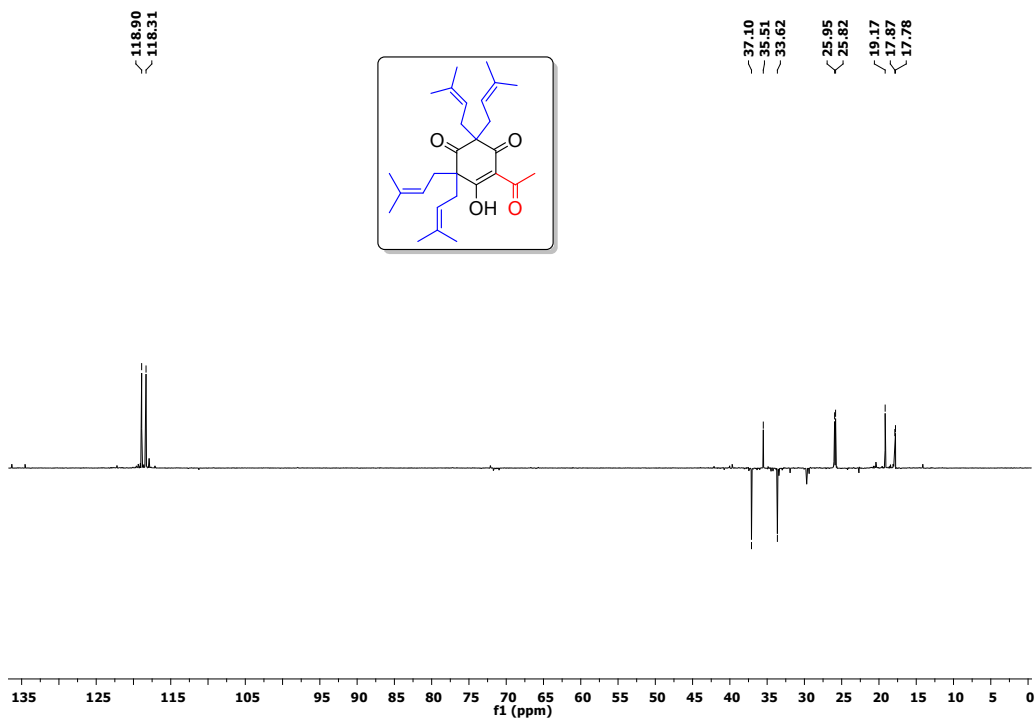

**S1.g.**  $^1\text{H}$ ,  $^{13}\text{C}$  and DEPT-135 NMR spectrum of 5-hydroxy-4-(isobutyryl)-2,2,6,6-tetramethylcyclohex-4-ene-1,3-dione (**3d**)

### $^1\text{H}$ NMR

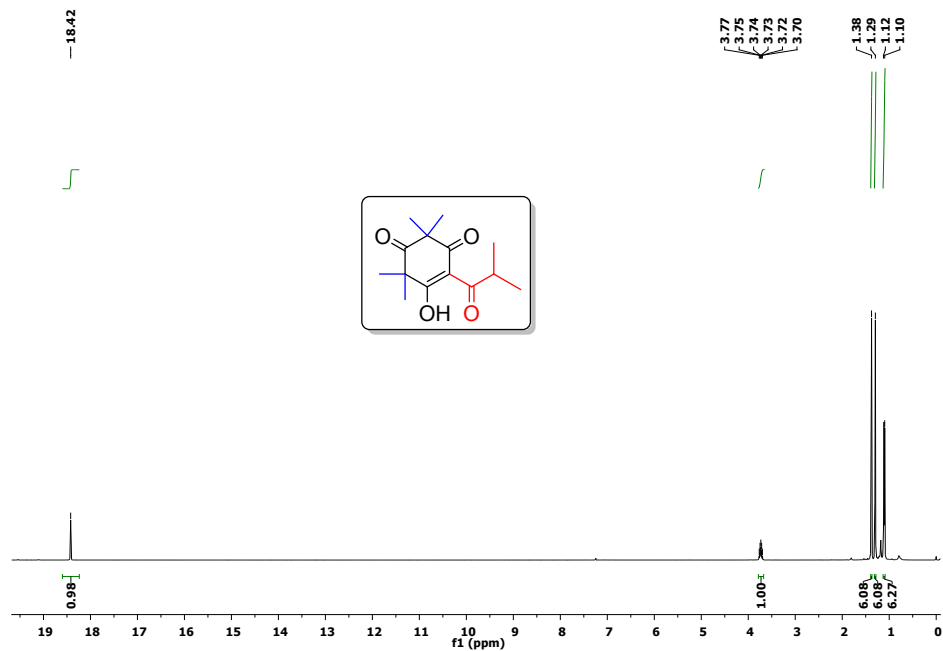

### $^{13}\text{C}$ NMR

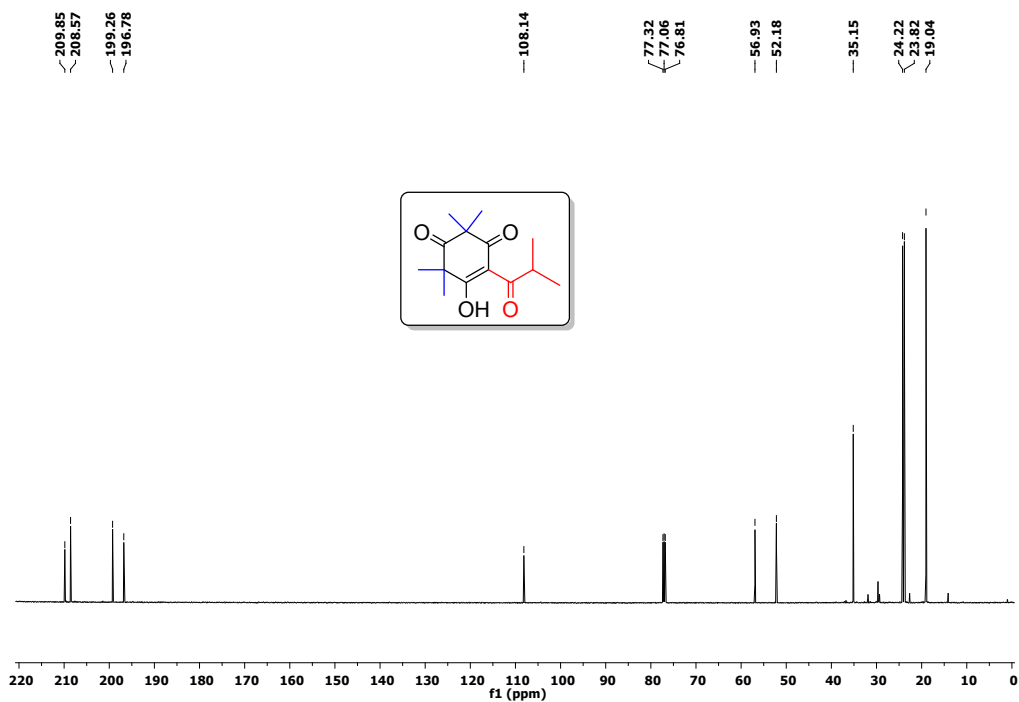



# DEPT

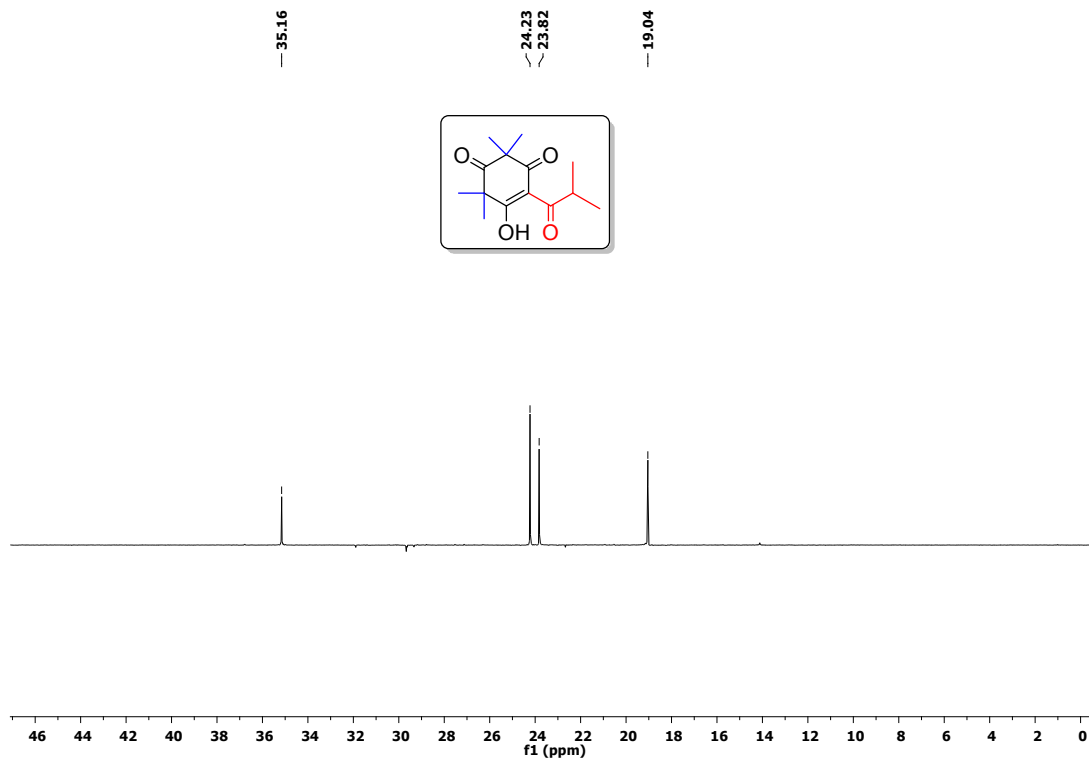

**S1.h.**  $^1\text{H}$ ,  $^{13}\text{C}$  and DEPT-135 NMR spectrum of 2,2,6,6-tetraallyl-5-hydroxy-4-(isobutyryl)cyclohex-4-ene-1,3-dione (**3e**)

**$^1\text{H}$ NMR**

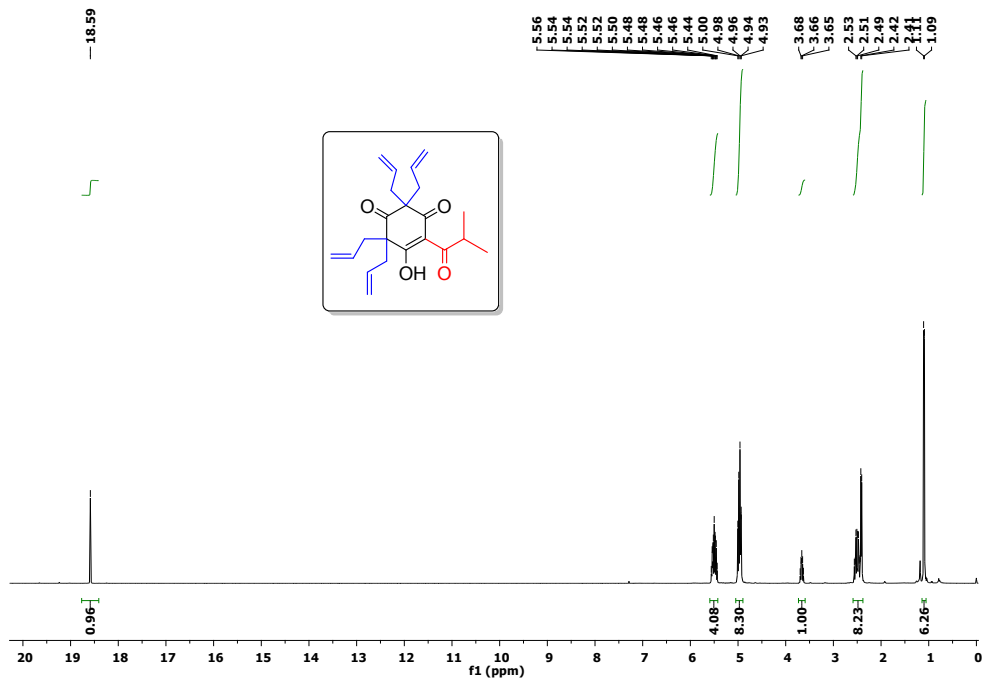

**$^{13}\text{C}$  NMR**

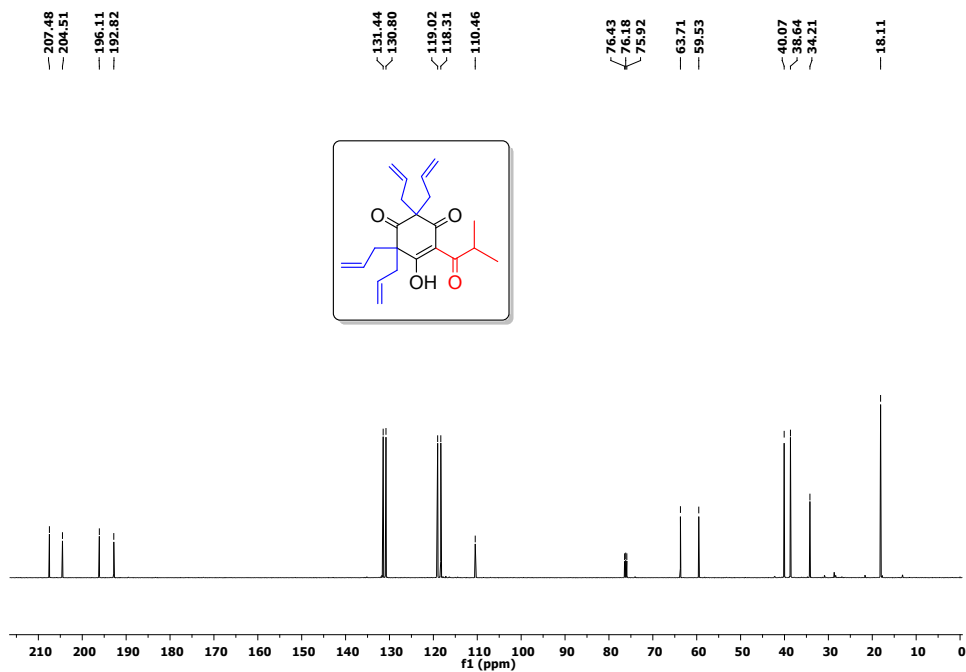

# DEPT

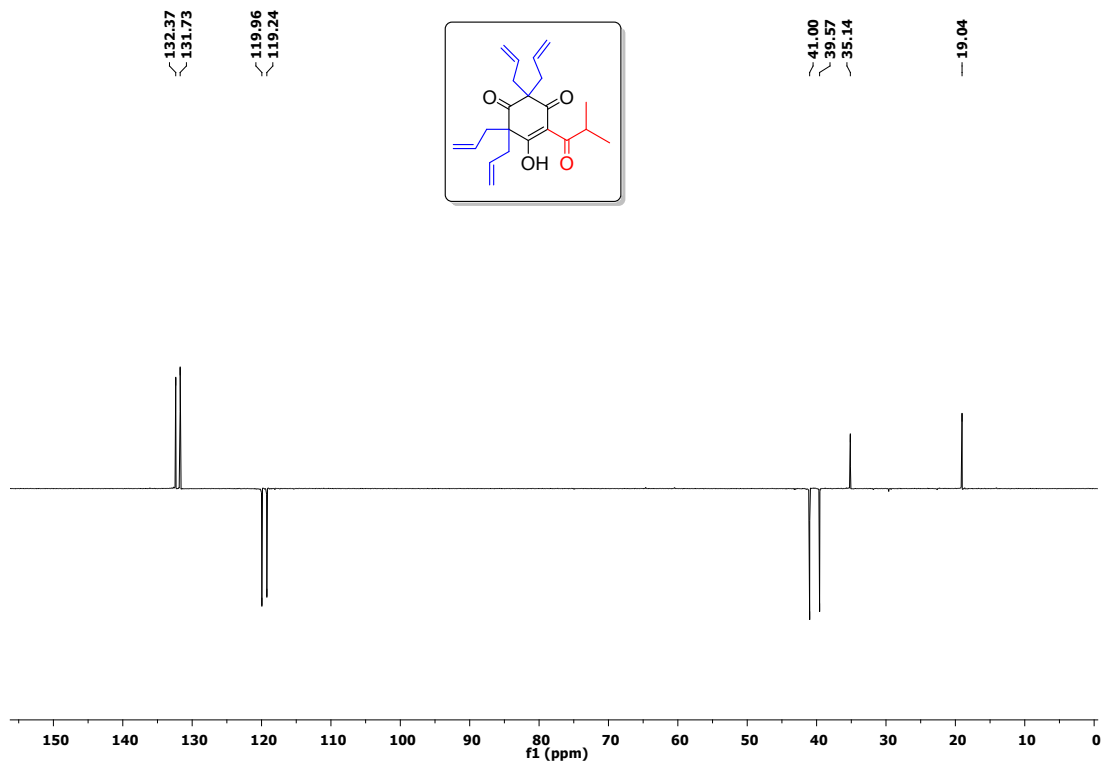

**S1.i.**  $^1\text{H}$ ,  $^{13}\text{C}$  and DEPT-135 NMR spectrum of 5-hydroxy-4-(isobutyryl)-2,2,6,6-tetra(prop-2-ynyl)cyclohex-4-ene-1,3-dione (**3f**)

**$^1\text{H}$ NMR**

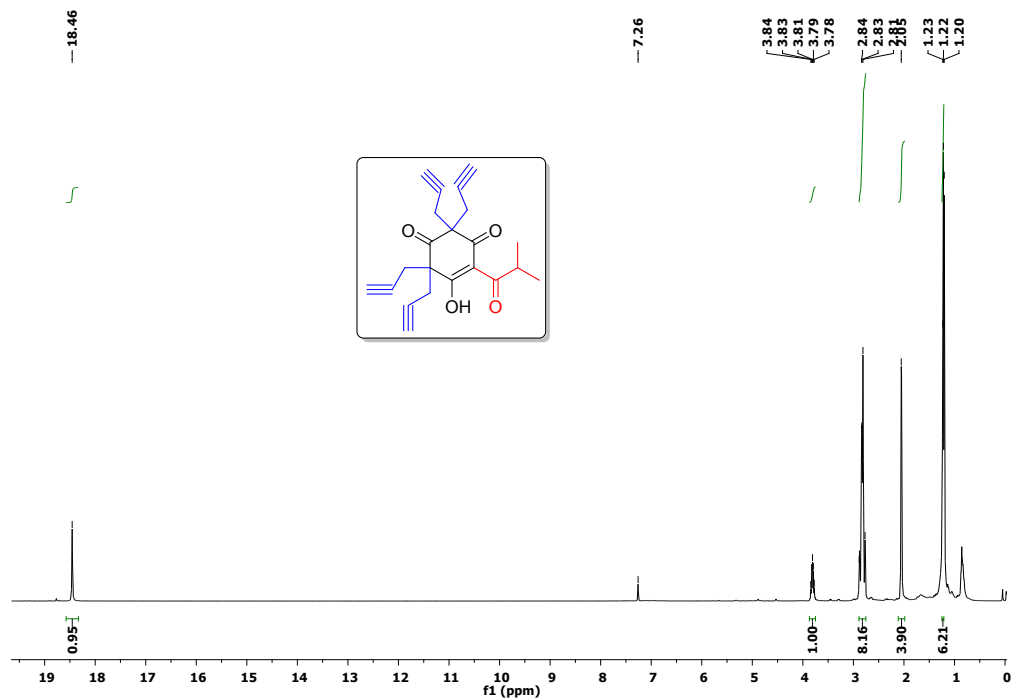

**$^{13}\text{C}$  NMR**

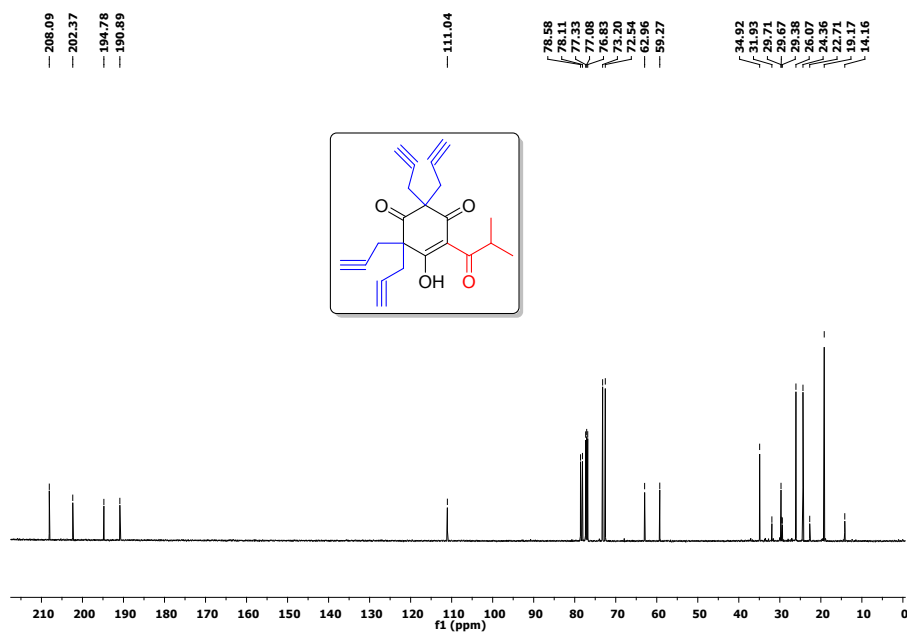

# DEPT

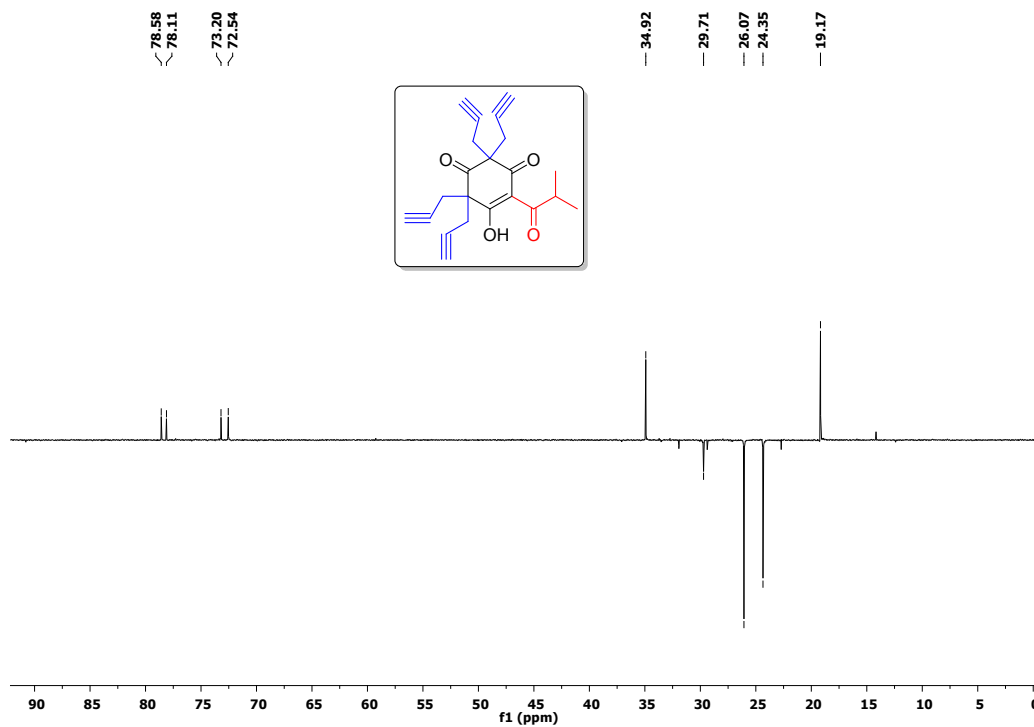

**S1.j.**  $^1\text{H}$ ,  $^{13}\text{C}$  and DEPT-135 NMR spectrum of 5-hydroxy-4-isobutyryl-2,2,6,6-tetrakis(3-methylbut-2-en-1-yl)cyclohex-4-ene-1,3-dione (**3g**)

**$^1\text{H}$  NMR**

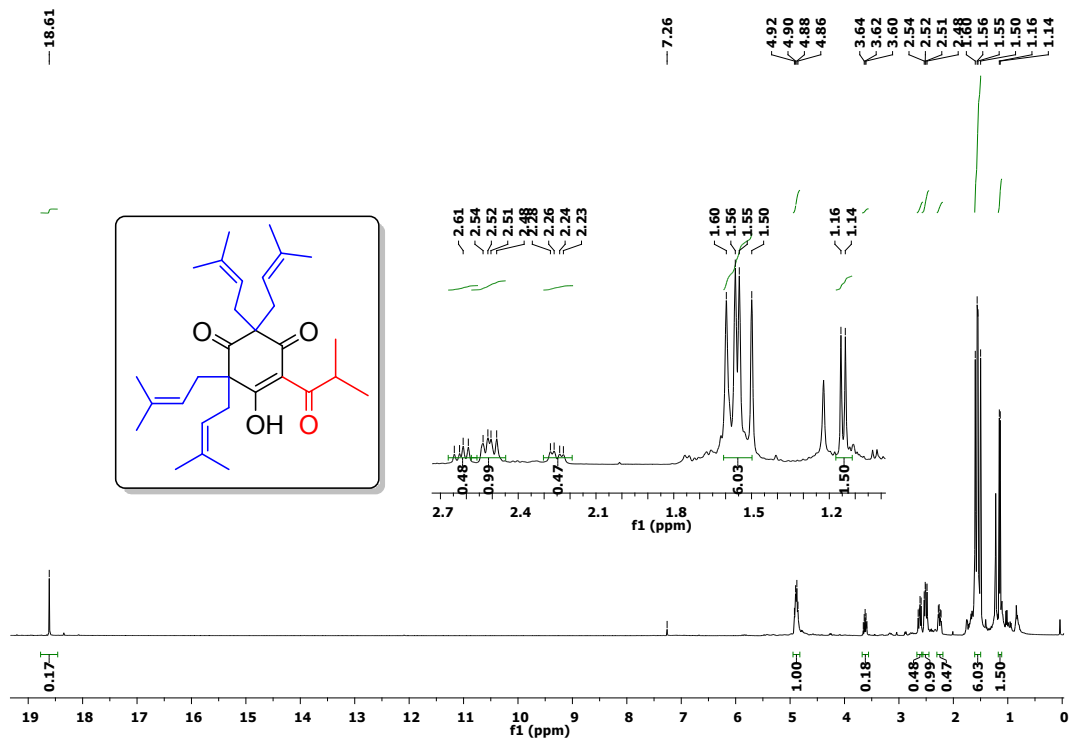

**$^{13}\text{C}$  NMR**

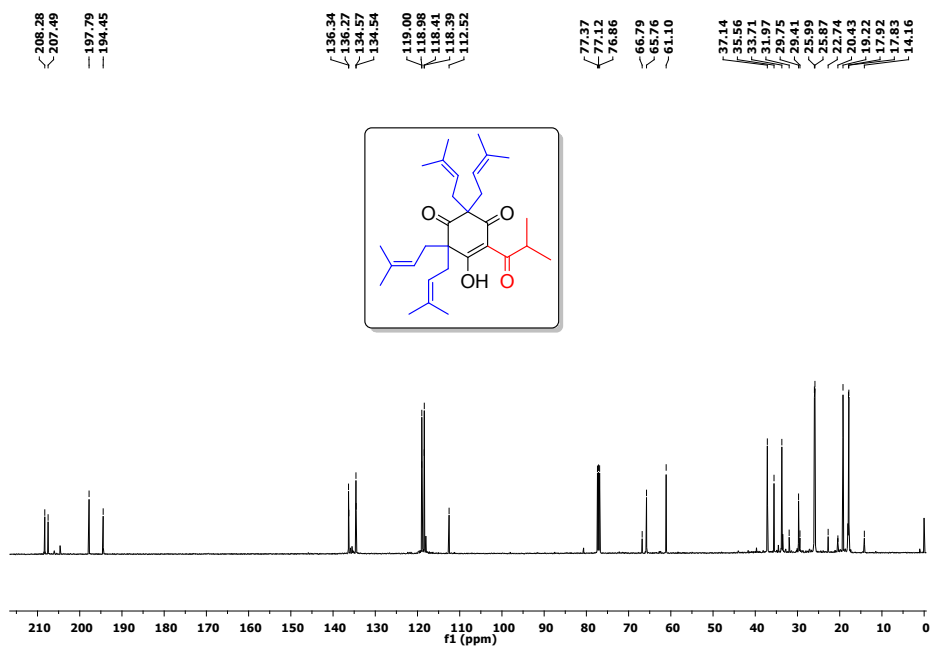

# DEPT

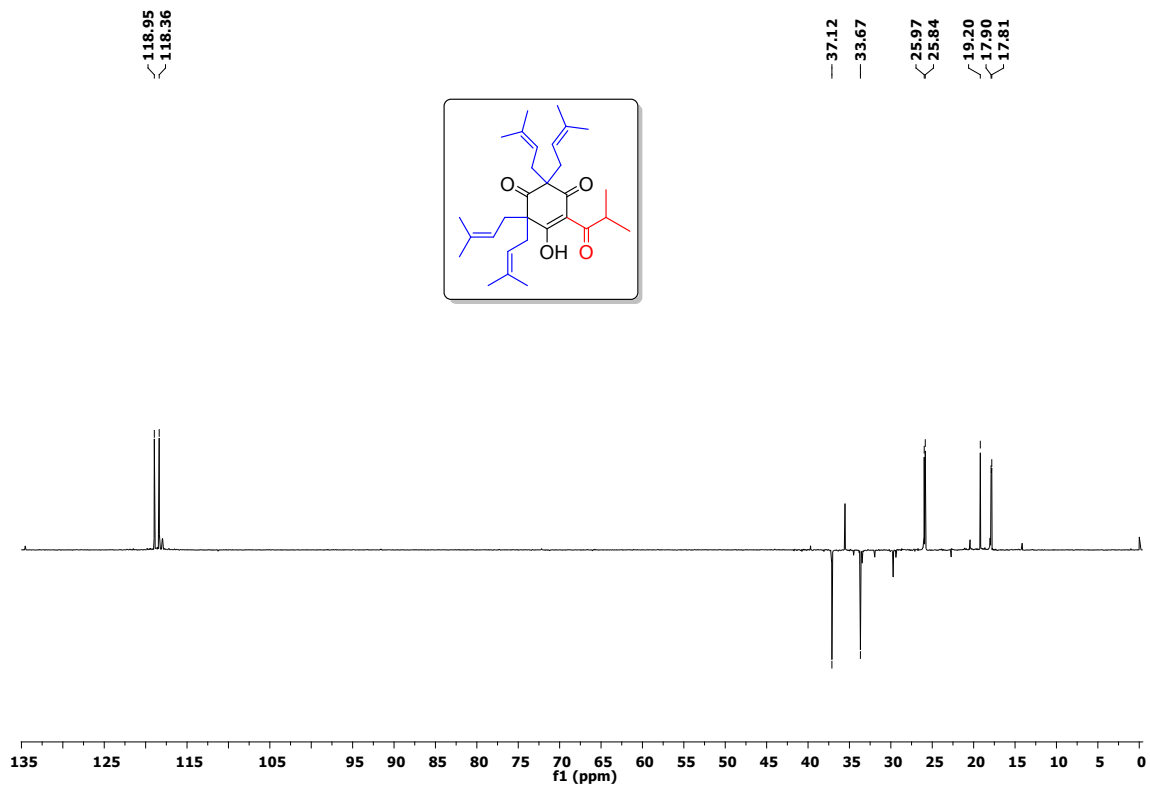

**S1.k.**  $^1\text{H}$ ,  $^{13}\text{C}$  and DEPT-135 NMR spectrum of 5-hydroxy-4-(isobutyryl)-2,2,6,6-tetrakis((E)-3,7-dimethylocta-2,6-dienyl)cyclohex-4-ene-1,3-dione (**3h**)

**$^1\text{H}$  NMR**

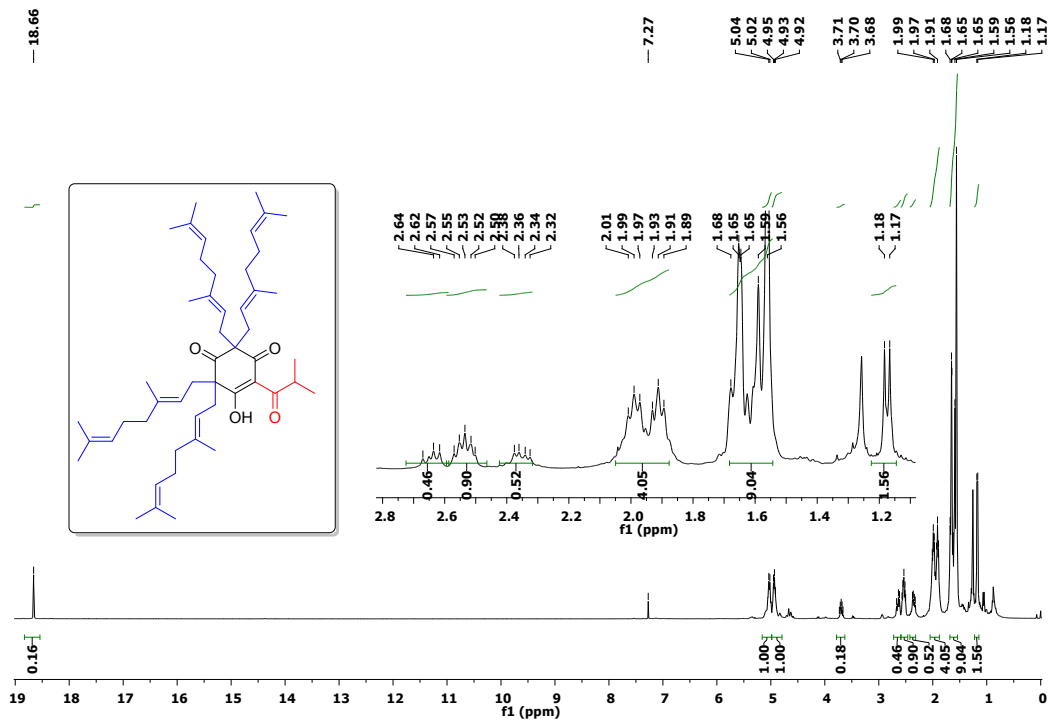

**$^{13}\text{C}$  NMR**

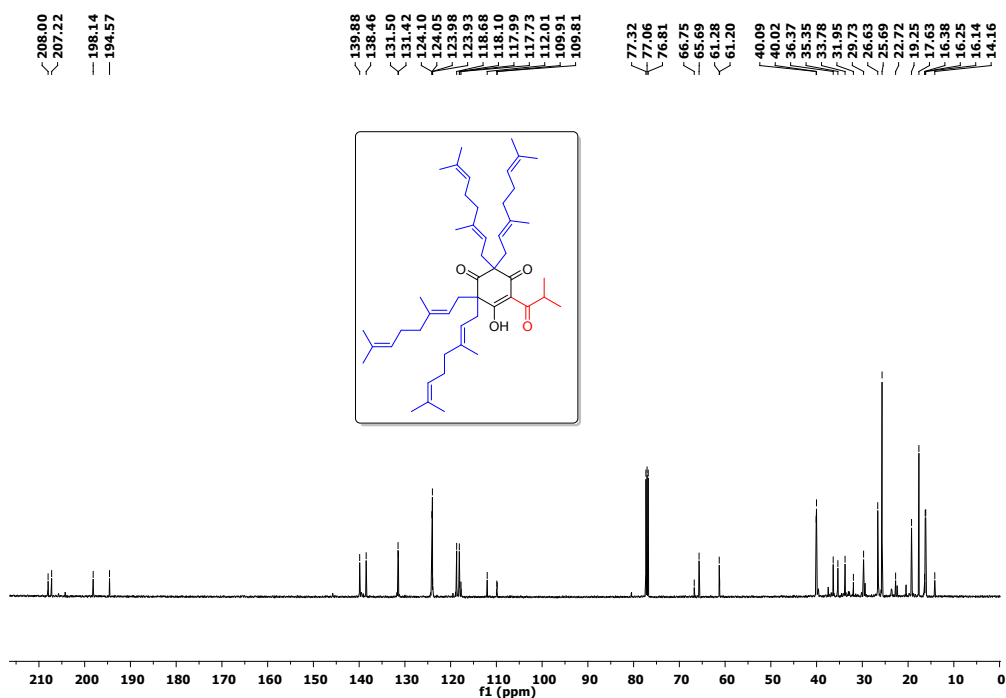



# DEPT

124.10  
123.98  
118.68  
118.10

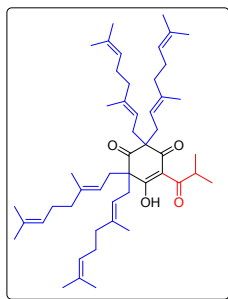

40.10  
40.02  
36.37  
35.35  
33.77  
26.63  
26.54  
25.69  
19.25  
17.64  
16.25  
16.14

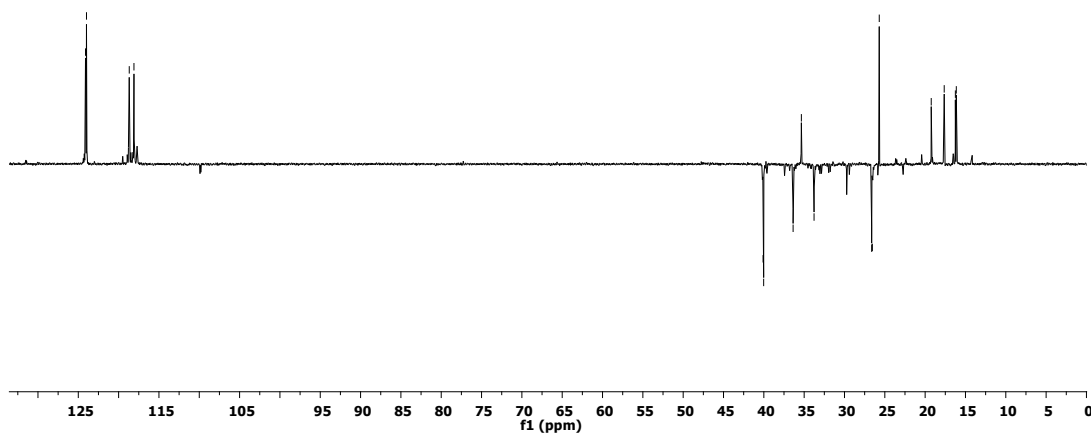

**S1.1.**  $^1\text{H}$ ,  $^{13}\text{C}$  and DEPT-135 NMR spectrum of 4-(3-methylbutanoyl)-5-hydroxy-2,2,6,6-tetramethylcyclohex-4-ene-1,3-dione (**3i**)

**$^1\text{H}$  NMR**

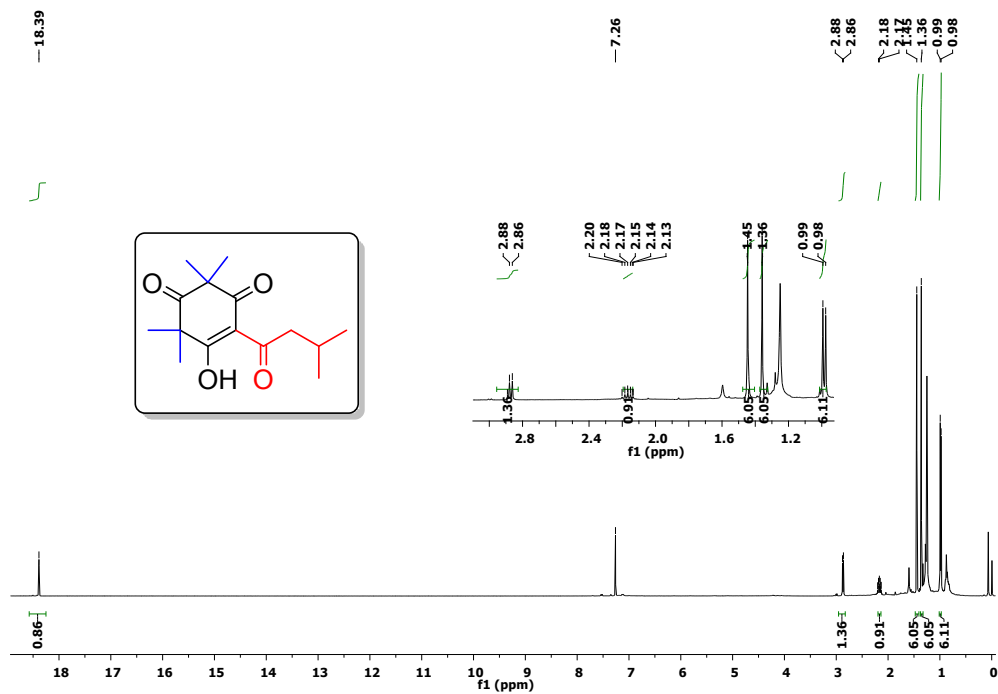

**$^{13}\text{C}$  NMR**

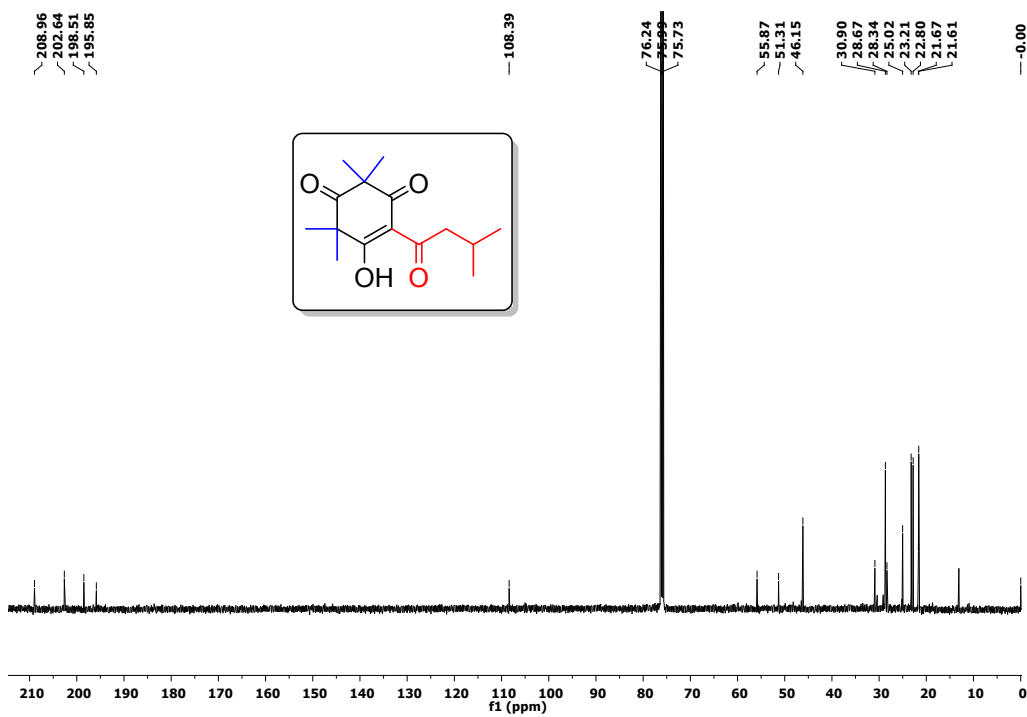

# DEPT

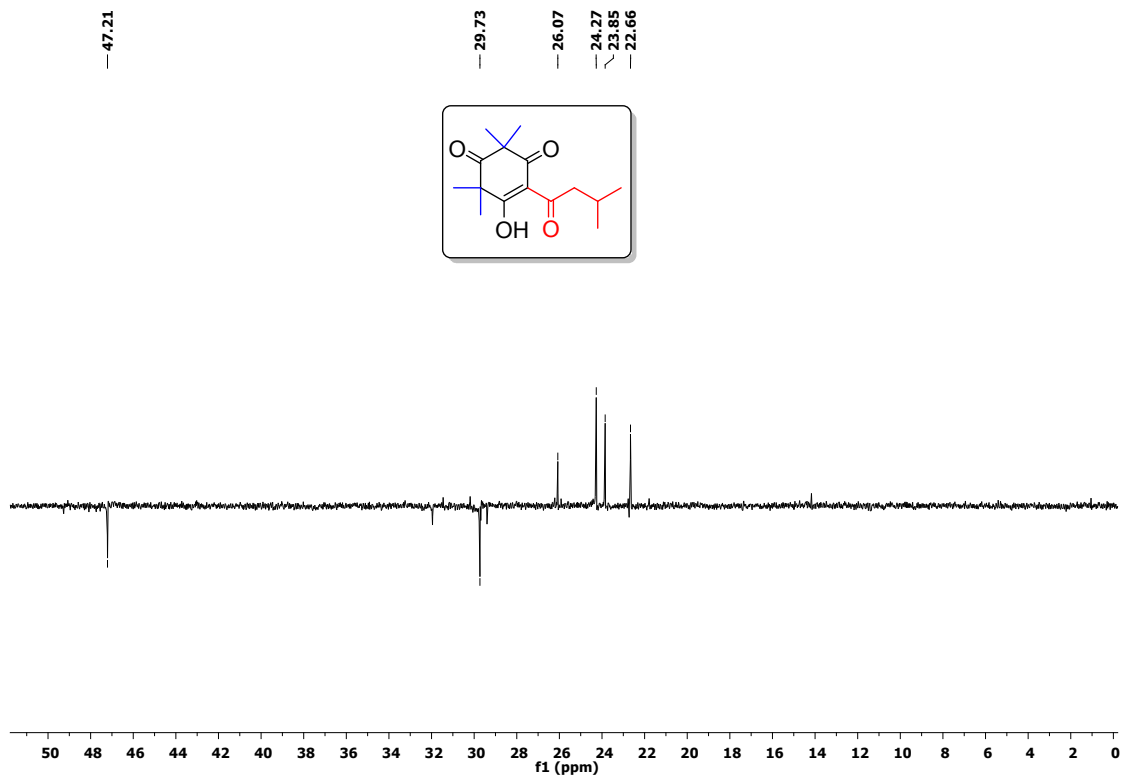

**S1.m.**  $^1\text{H}$ ,  $^{13}\text{C}$  and DEPT-135 NMR spectrum of 4-(3-methylbutanoyl)-2,2,6,6-tetraallyl-5-hydroxycyclohex-4-ene-1,3-dione (**3j**)

**$^1\text{H}$  NMR**

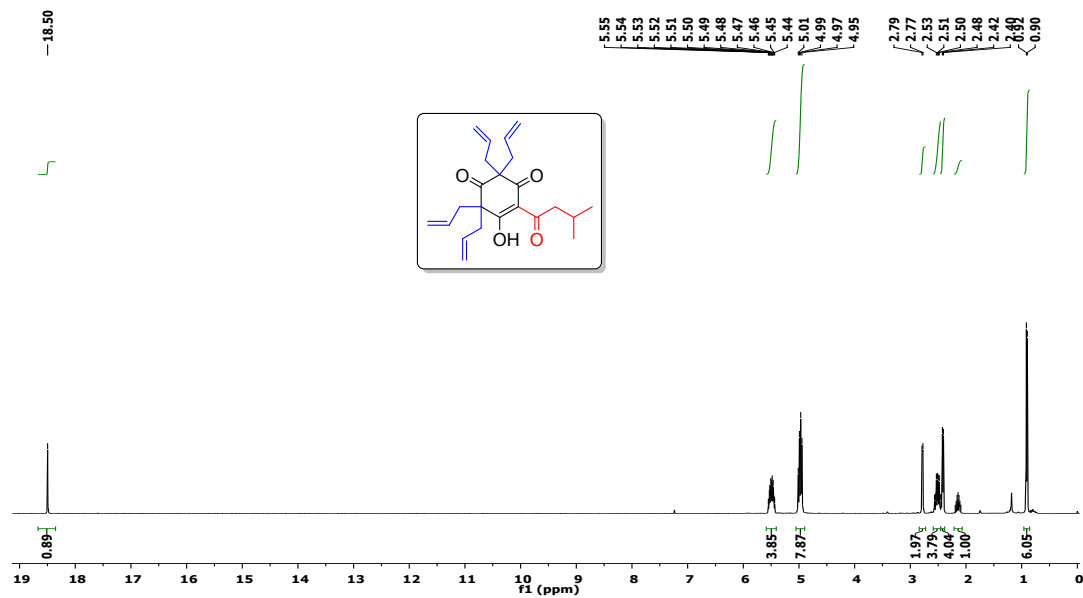

**$^{13}\text{C}$  NMR**

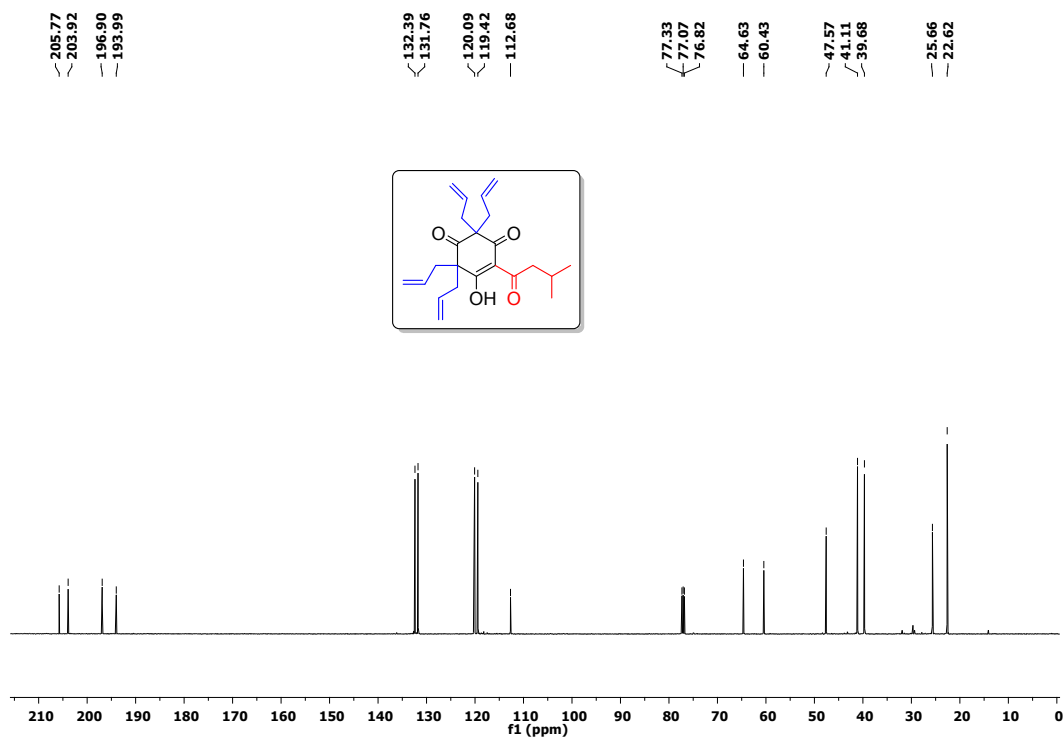

# DEPT

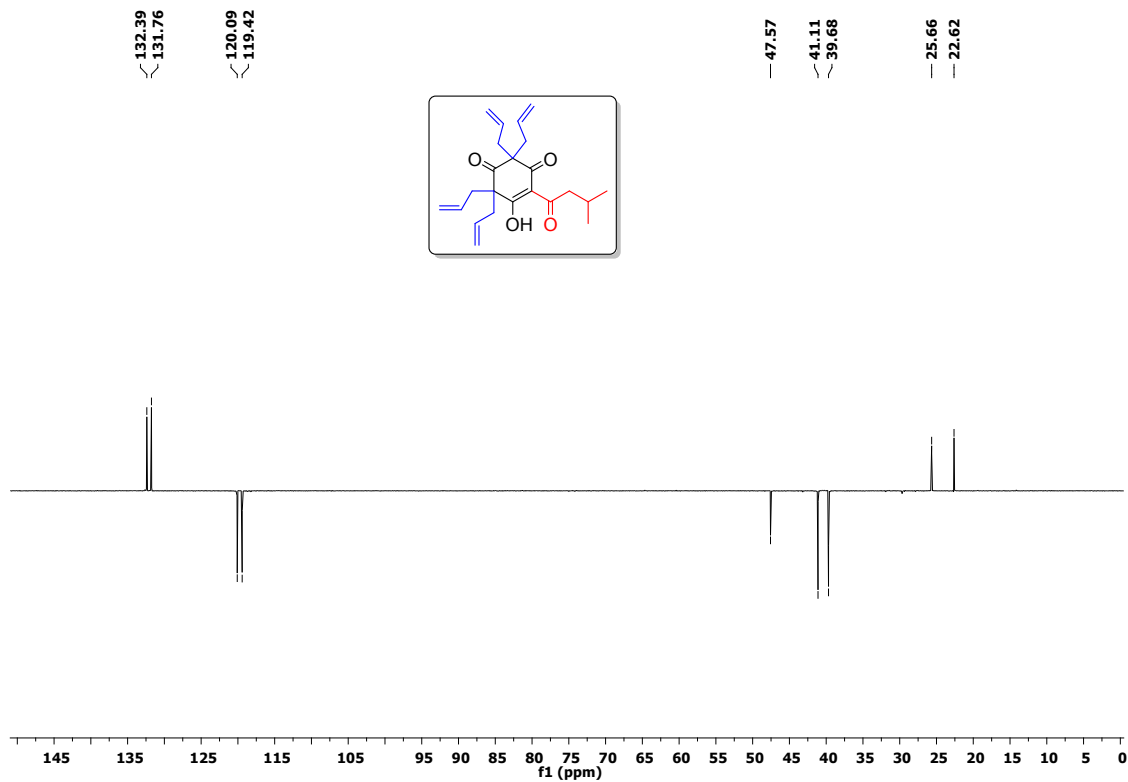

**S1.n.**  $^1\text{H}$ ,  $^{13}\text{C}$  and DEPT-135 NMR spectrum of 4-(3-methylbutanoyl)-5-hydroxy-2,2,6,6-tetrakis(3-methylbut-2-enyl)cyclohex-4-ene-1,3-dione (**3k**)

**$^1\text{H}$  NMR**

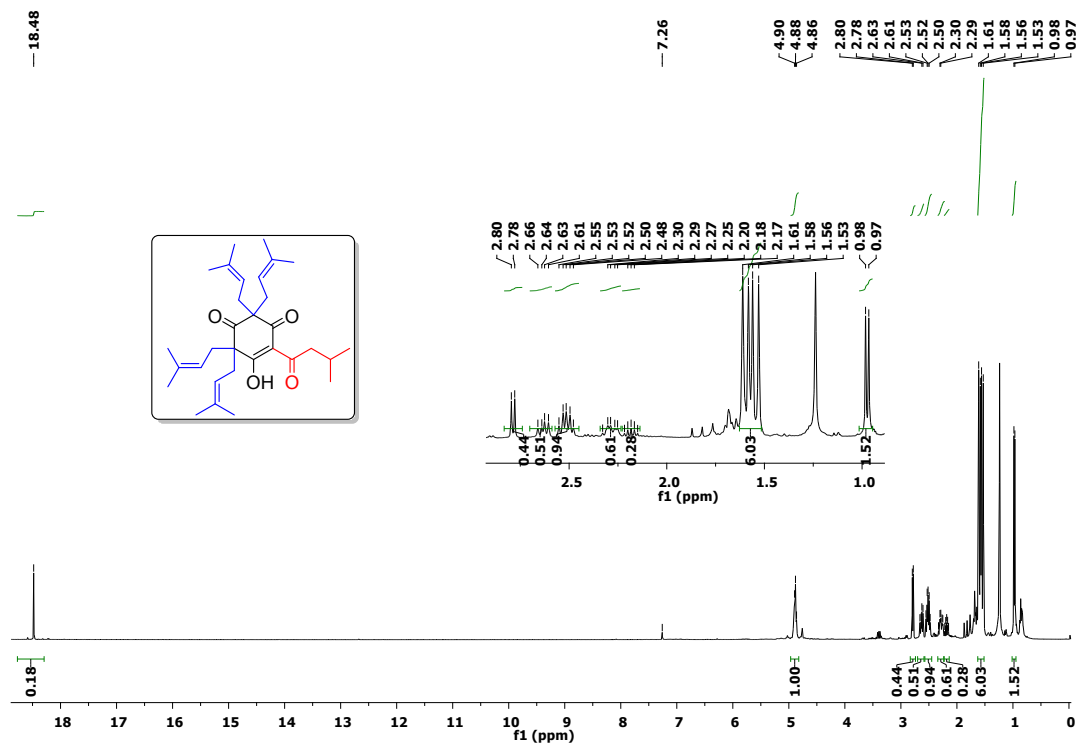

**$^{13}\text{C}$  NMR**

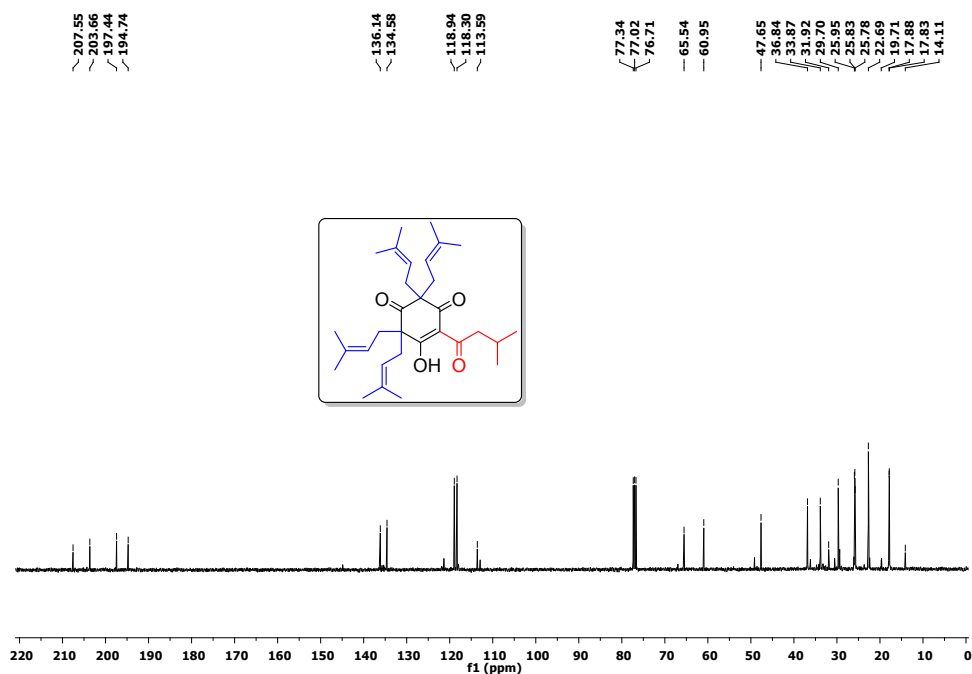

# DEPT

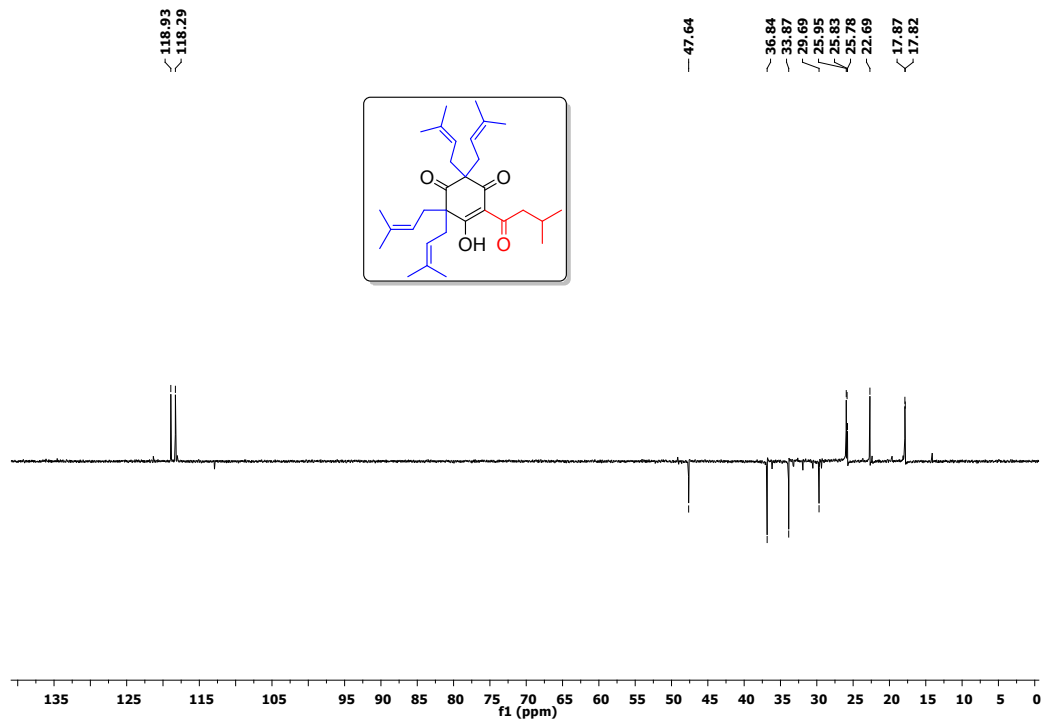

S1.0.  $^1\text{H}$ ,  $^{13}\text{C}$  and DEPT-135 NMR spectrum of 1,3-diacetyl-2,4,6-trihydroxy benzene (**4a**)

$^1\text{H}$  NMR

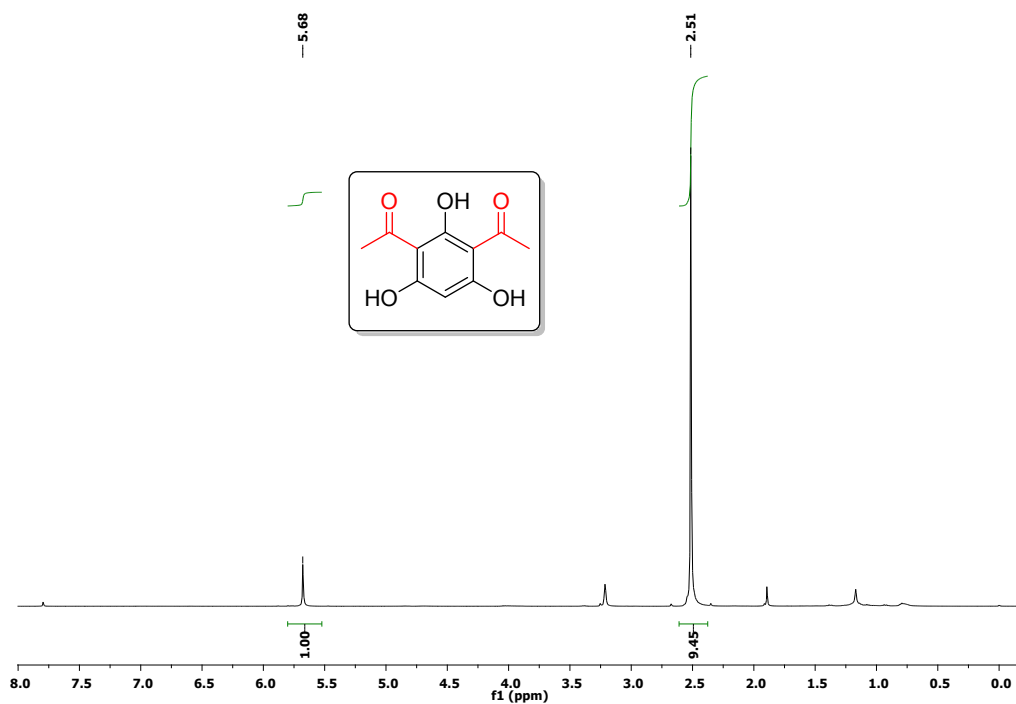

$^{13}\text{C}$  NMR

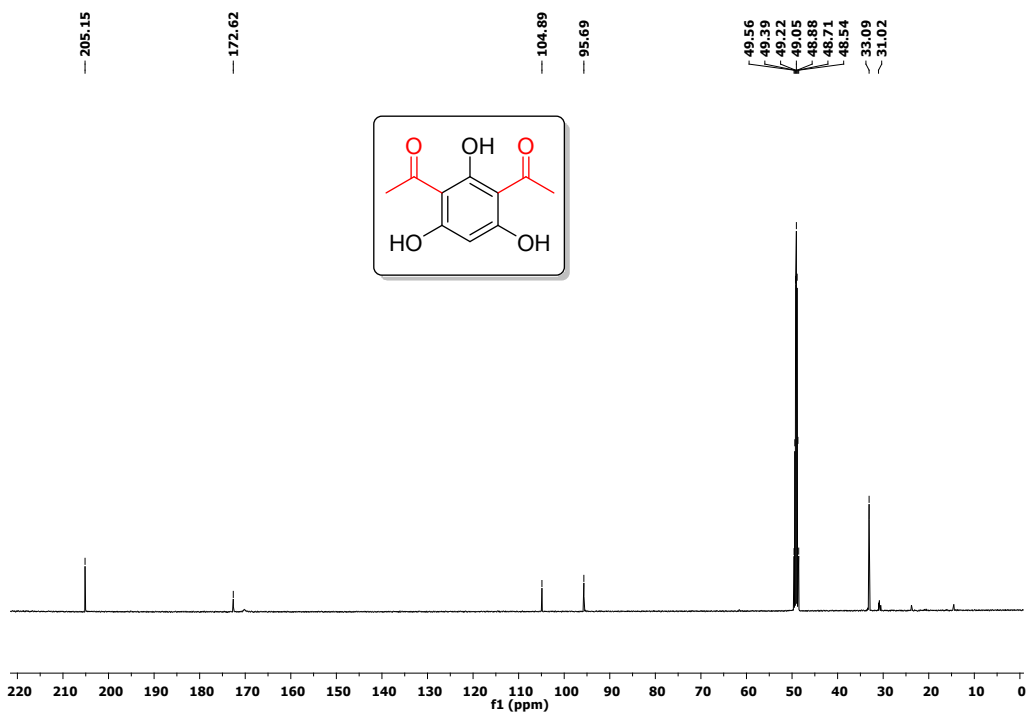



# DEPT

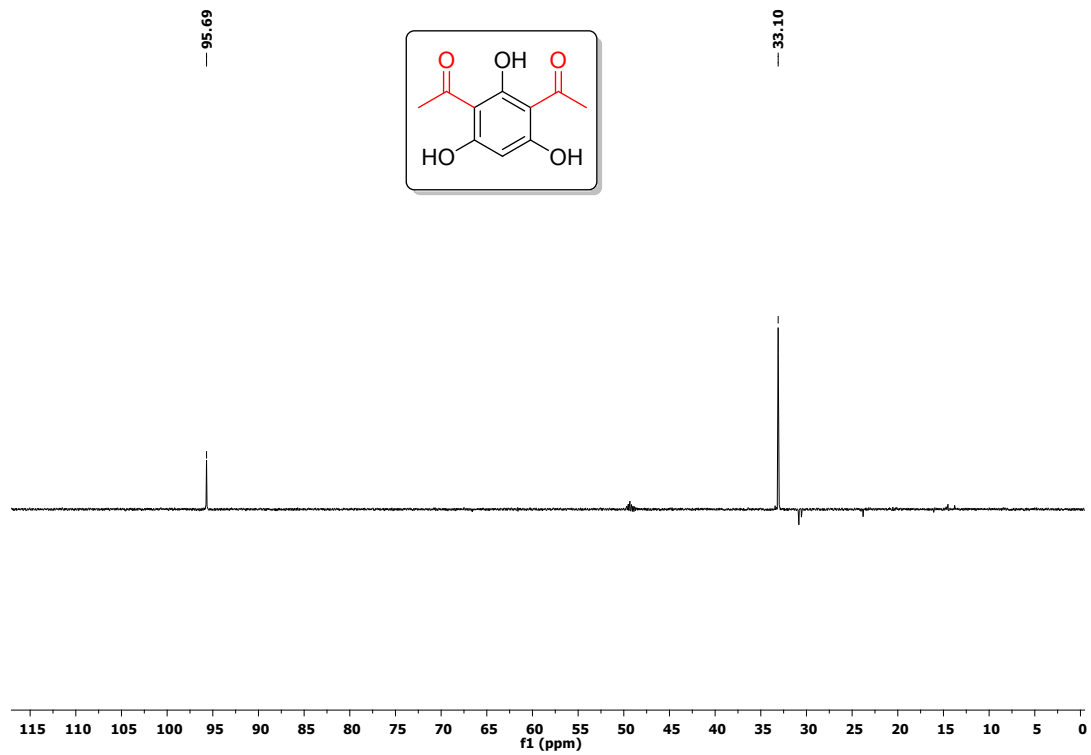

S1.p.  $^1\text{H}$ ,  $^{13}\text{C}$  and DEPT-135 NMR spectrum of 1,3-dipropanoyl-2,4,6-trihydroxy benzene (**4b**)

$^1\text{H}$  NMR

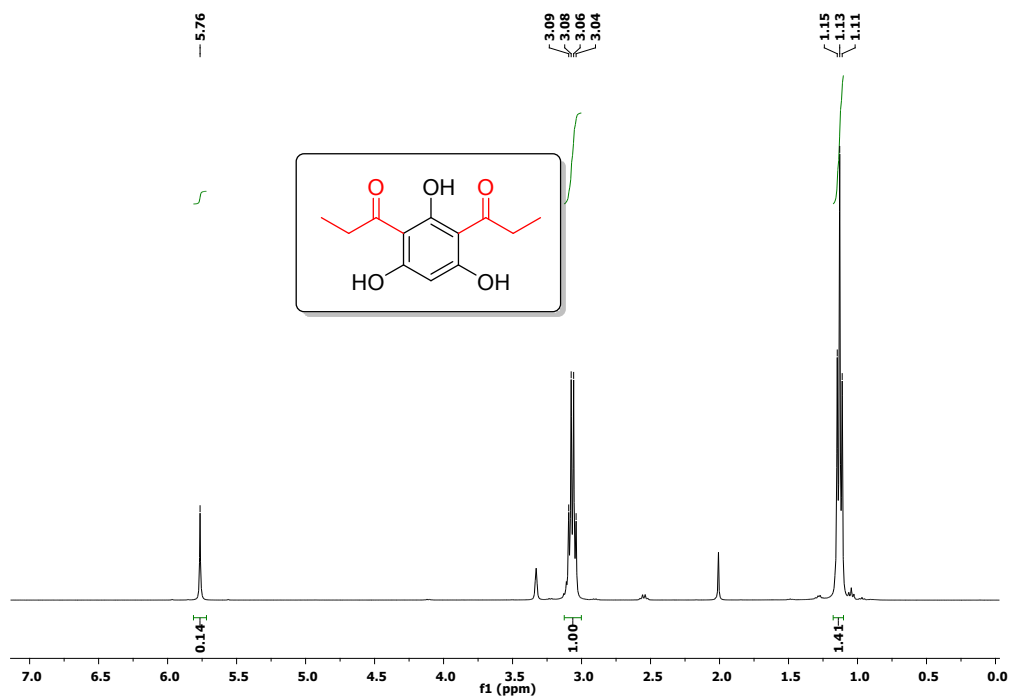

$^{13}\text{C}$  NMR

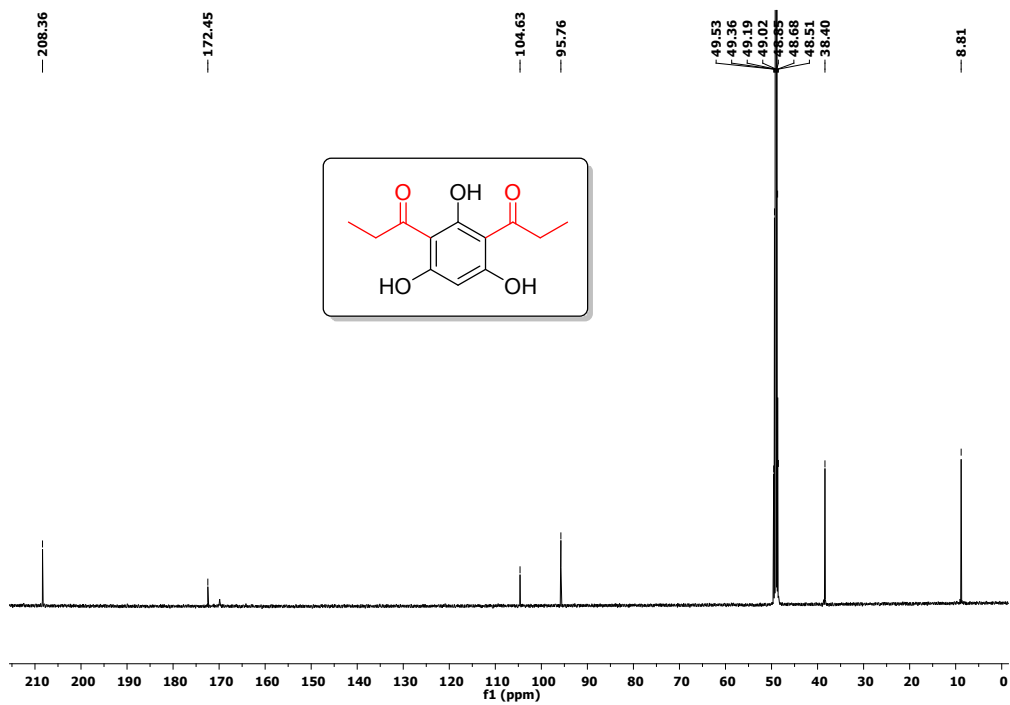

# DEPT

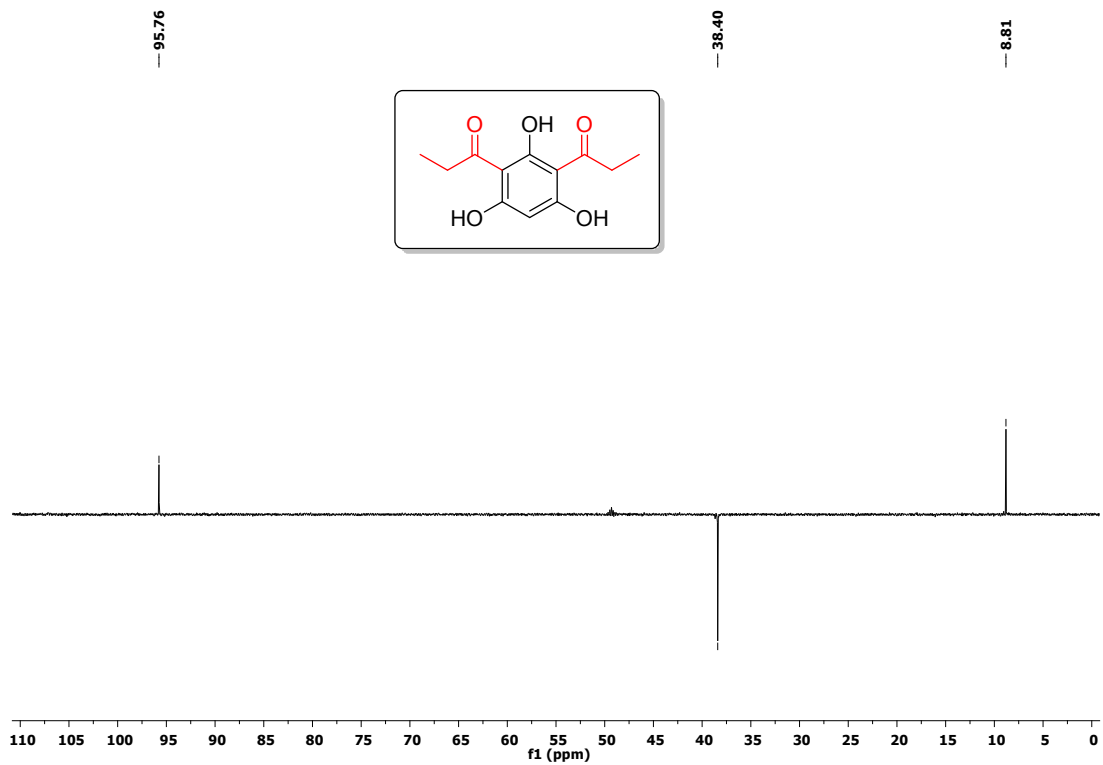

**S1.q.**  $^1\text{H}$ ,  $^{13}\text{C}$  and DEPT-135 NMR spectrum of 1,3-di-(3-Methyl-butanoyl)-2,4,6-trihydroxy benzene (**4c**)

### $^1\text{H}$ NMR

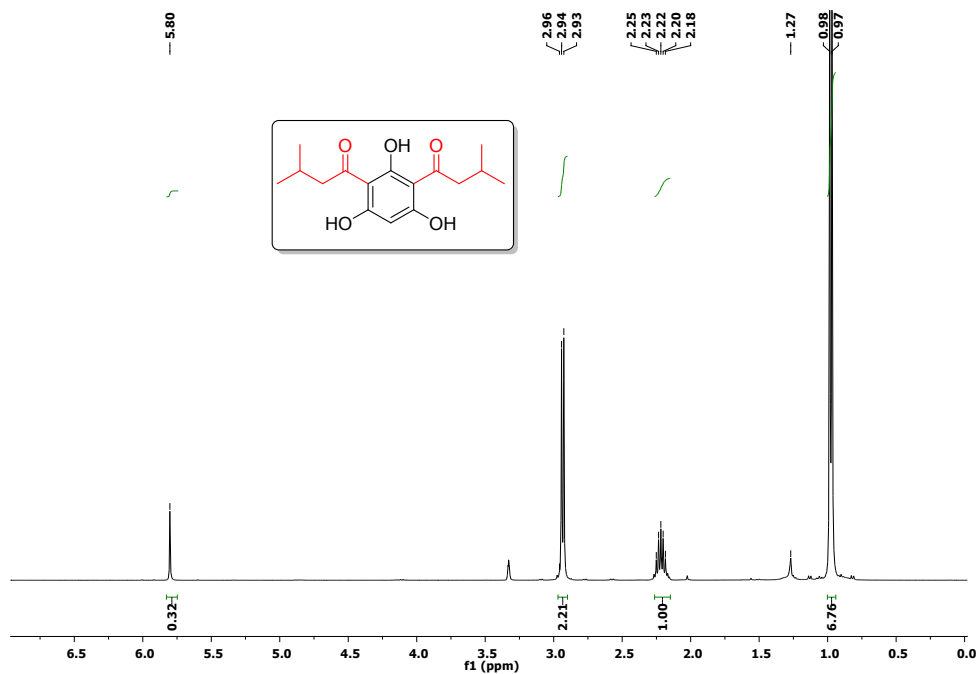

### $^{13}\text{C}$ NMR

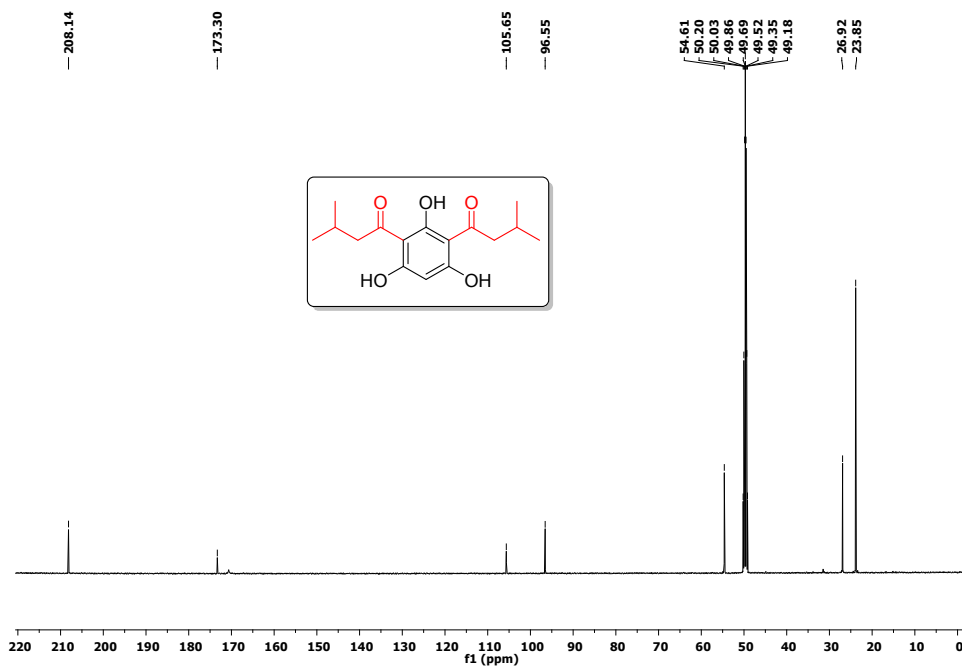

# DEPT

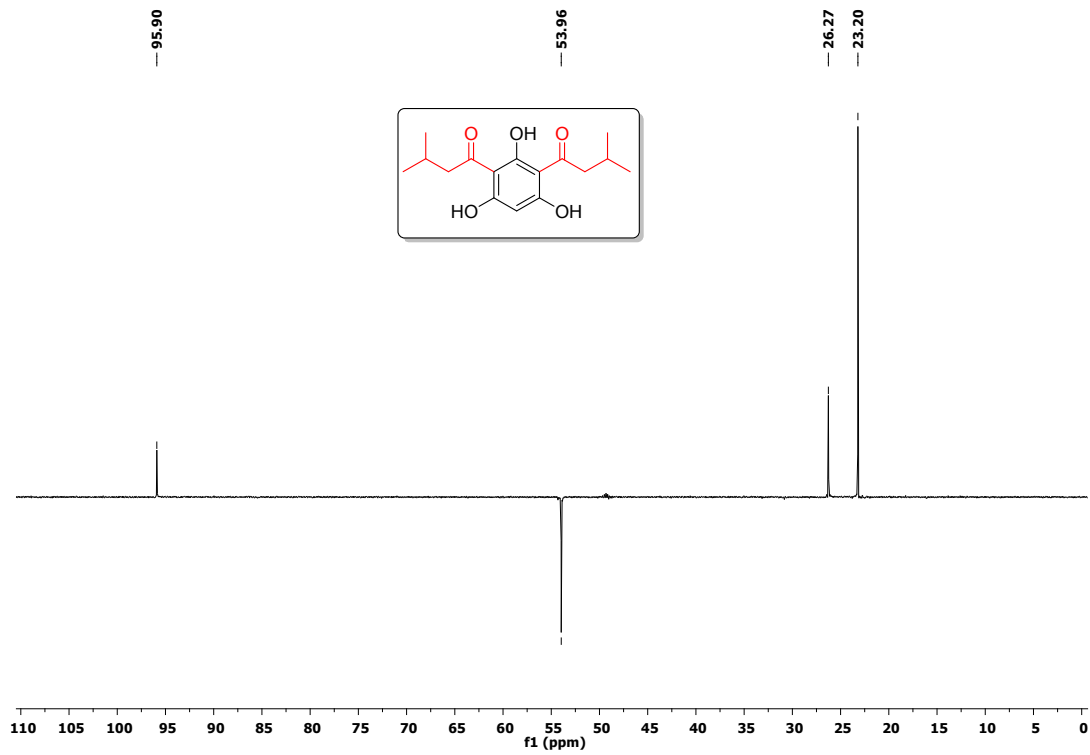

**S1.r.**  $^1\text{H}$ ,  $^{13}\text{C}$  and DEPT-135 NMR spectrum of 2,6-diacetyl-3,5-dihydroxy-4,4-dimethylcyclohexa-2,5-dienone (**5a**)

**$^1\text{H}$  NMR**

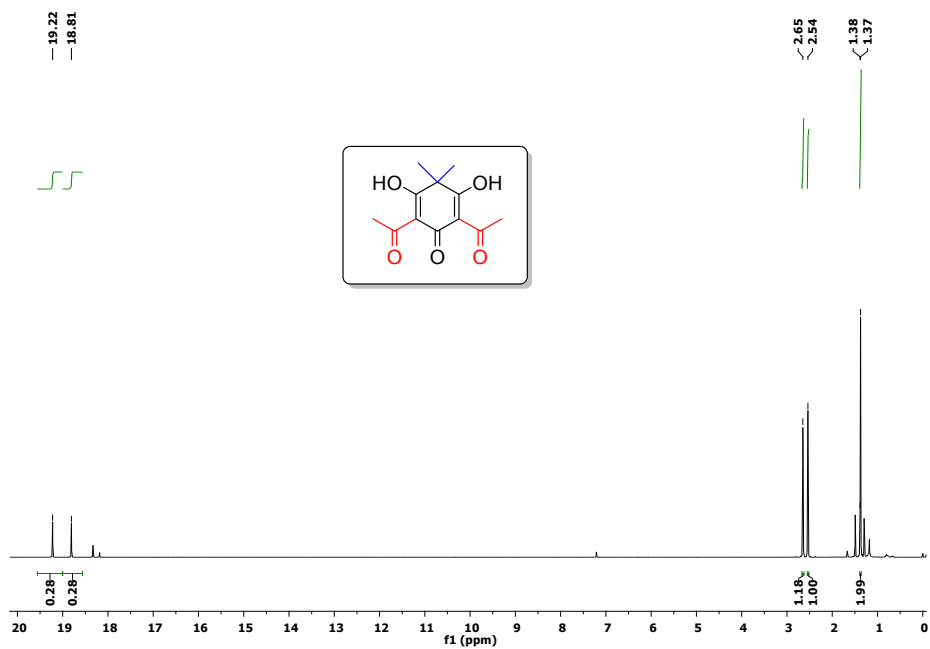

**$^{13}\text{C}$  NMR**

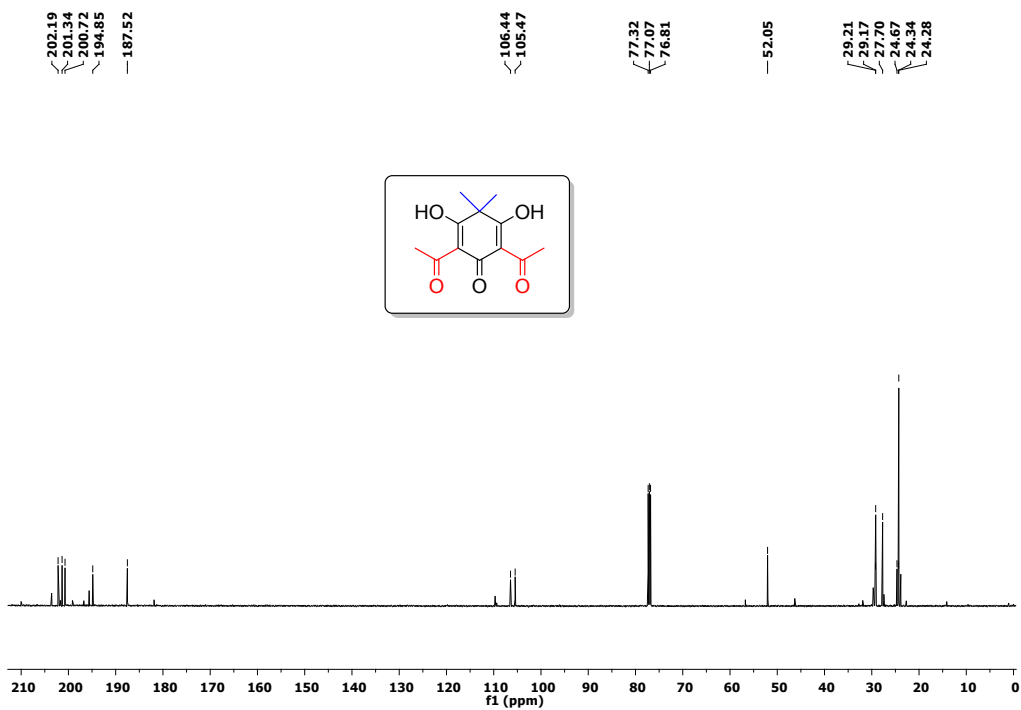

# DEPT

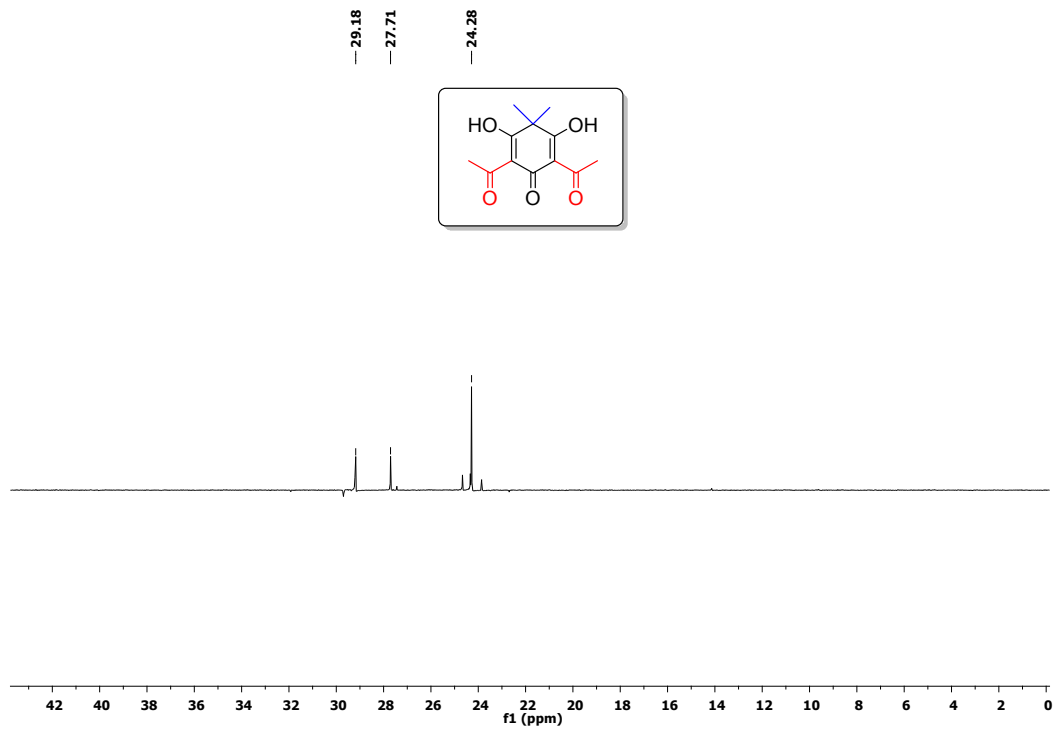

**S1.s.**  $^1\text{H}$ ,  $^{13}\text{C}$  and DEPT-135 NMR spectrum of 2,6-diacetyl-4,4-diallyl-3,5-dihydroxycyclohexa-2,5-dienone (**5b**)

**$^1\text{H}$  NMR**

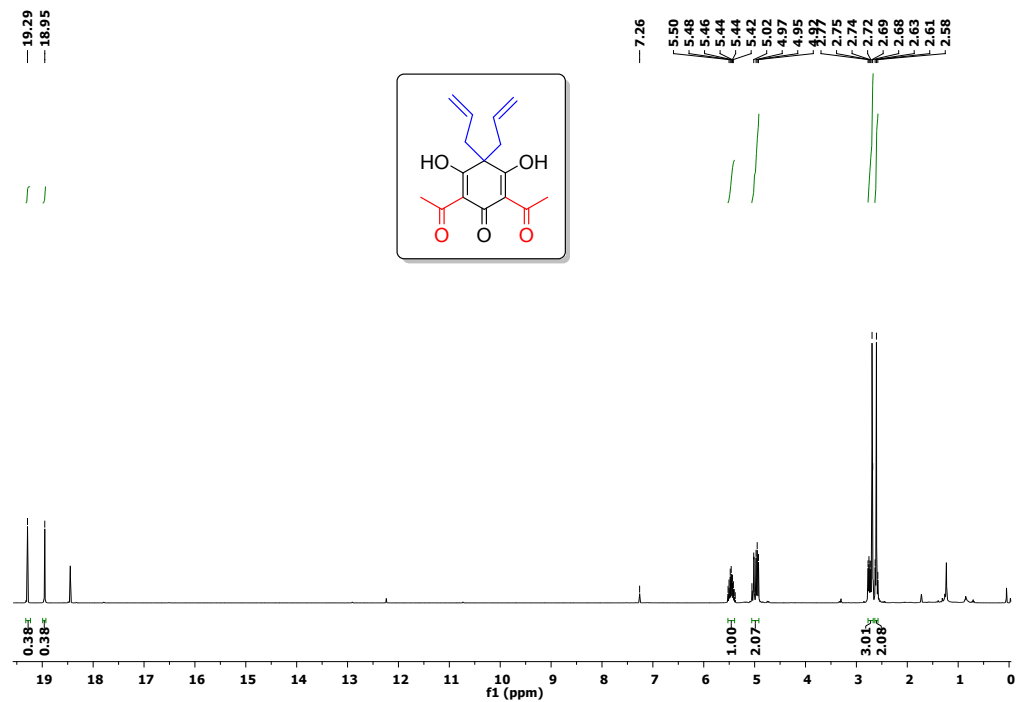

**$^{13}\text{C}$  NMR**

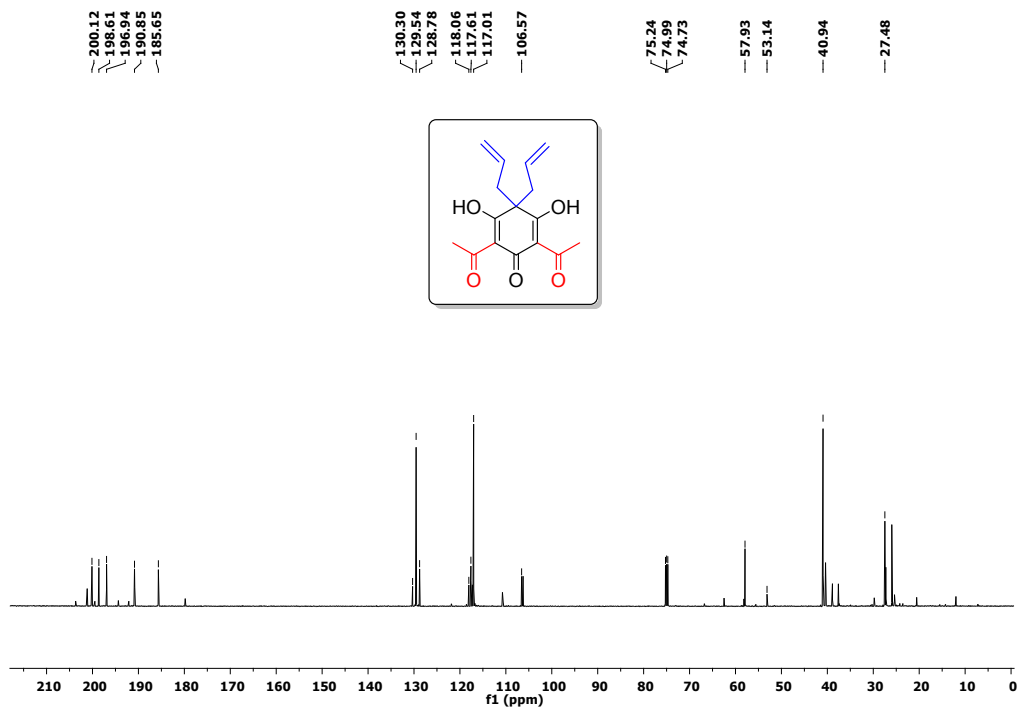



# DEPT

131.65

119.73  
119.13

43.05  
42.51

29.59  
28.09

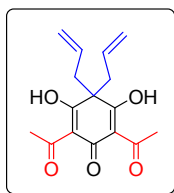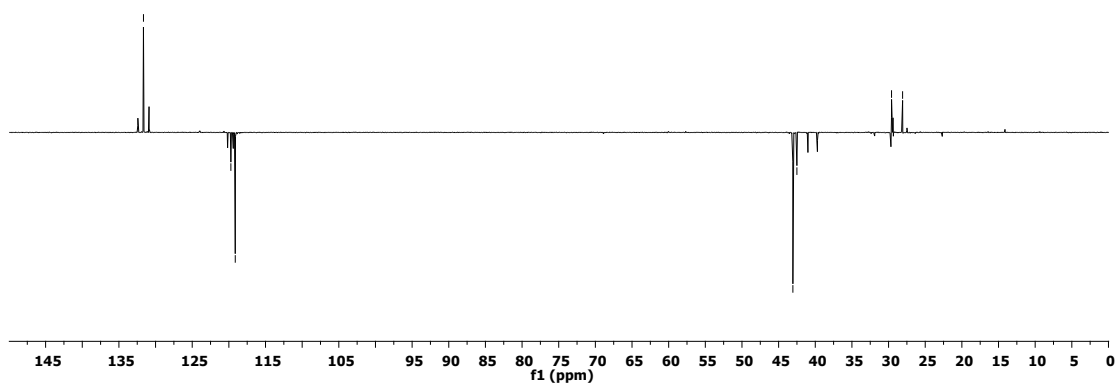

**S1.t.**  $^1\text{H}$ ,  $^{13}\text{C}$  and DEPT-135 NMR spectrum of 2,6-diacetyl-3,5-dihydroxy-4,4-bis(3-methylbut-2-enyl)cyclohexa-2,5-dienone (**5c**)

### $^1\text{H}$ NMR

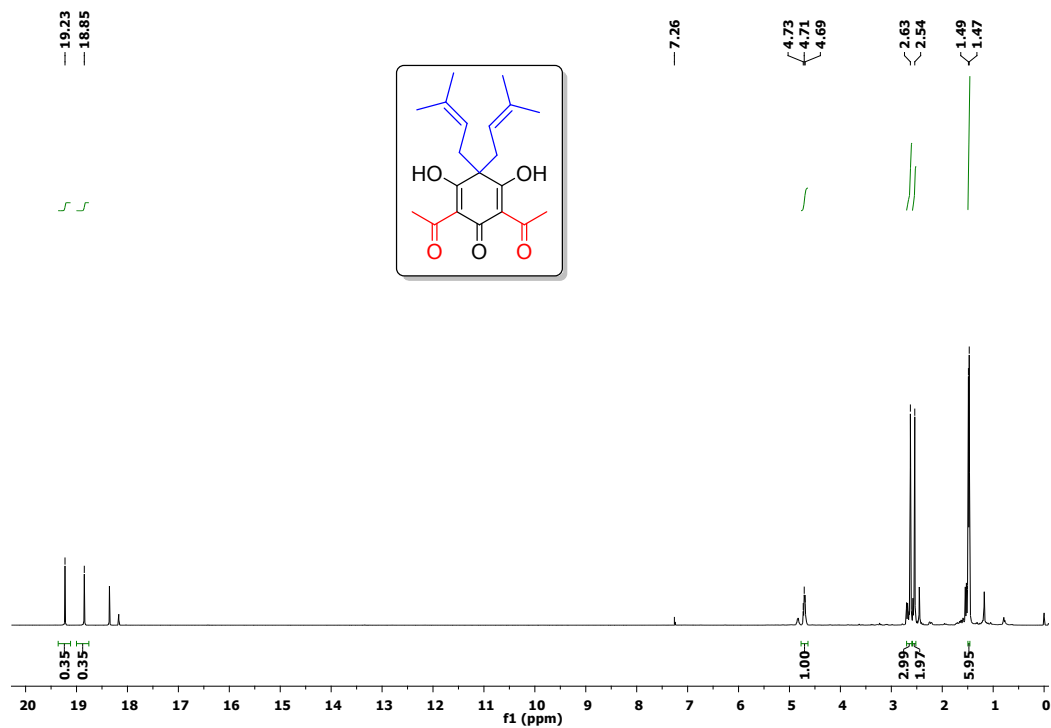

### $^{13}\text{C}$ NMR

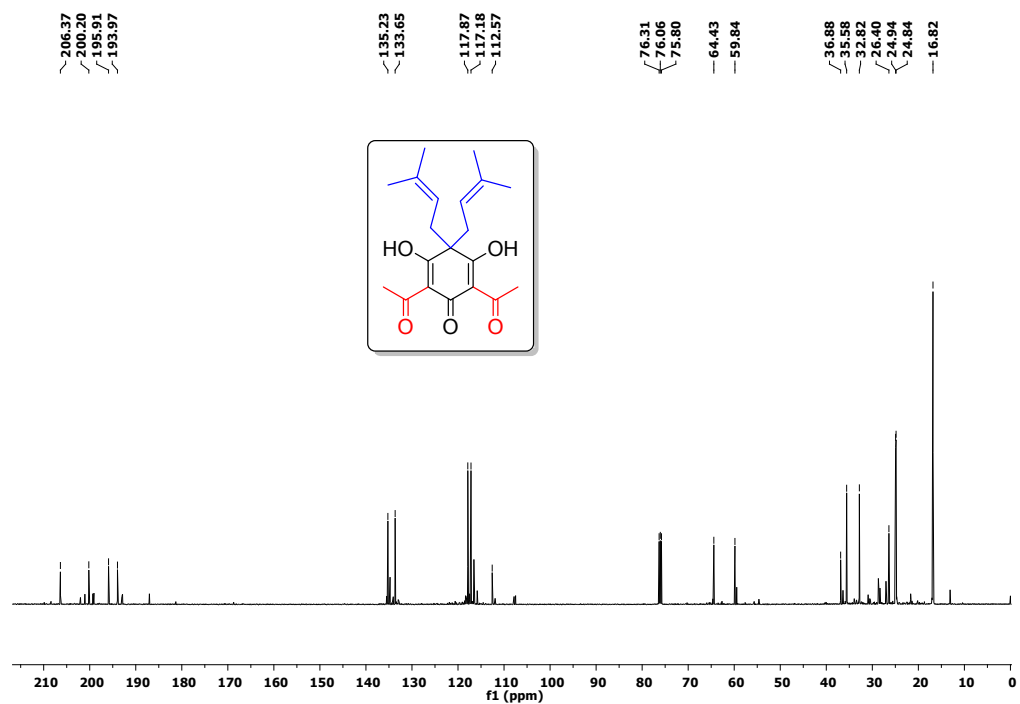

# DEPT

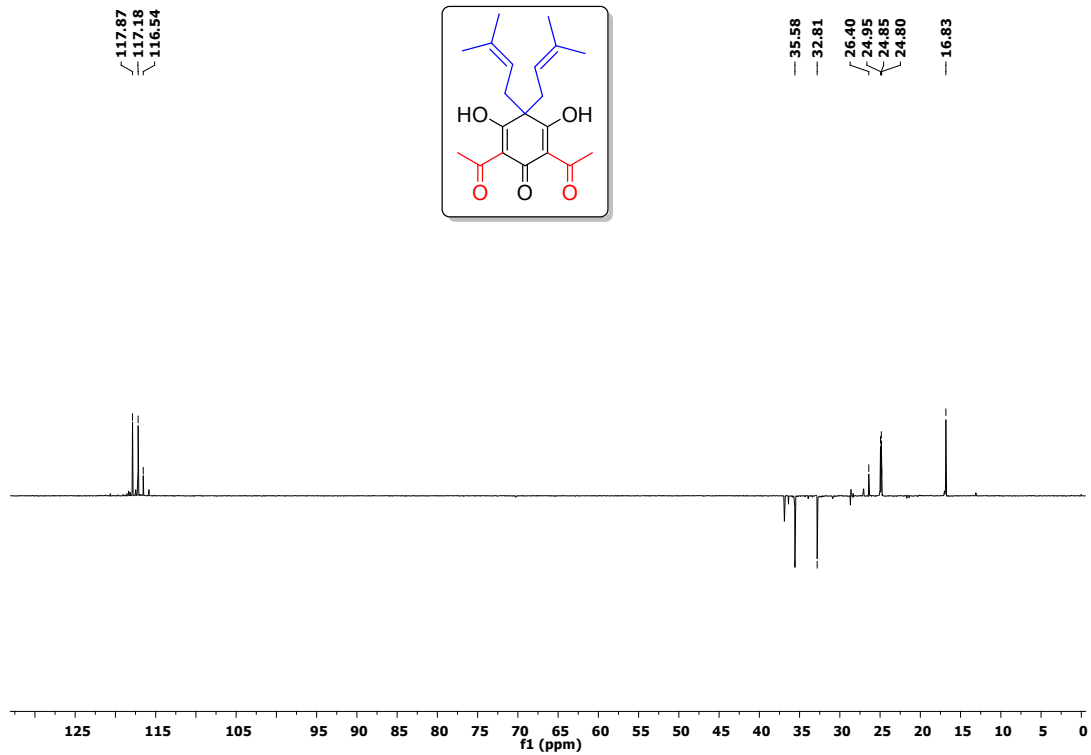

**S1.u.**  $^1\text{H}$ ,  $^{13}\text{C}$  and DEPT-135 NMR spectrum of 3,5-dihydroxy-4,4-dimethyl-2,6-dipropionylcyclohexa-2,5-dienone (**5d**)

**$^1\text{H}$  NMR**

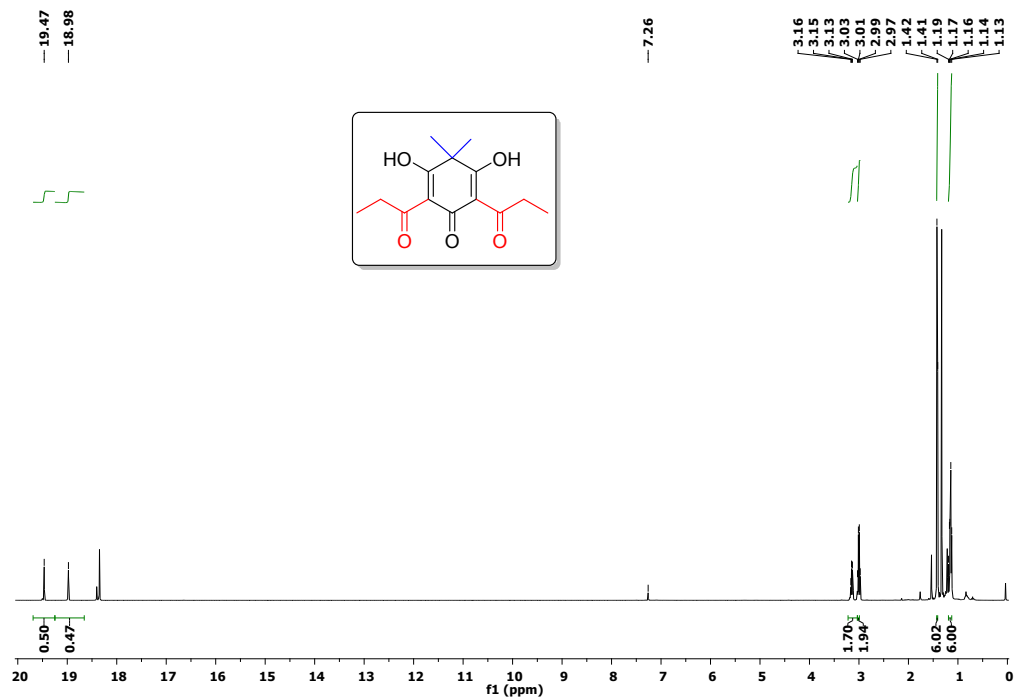

**$^{13}\text{C}$  NMR**

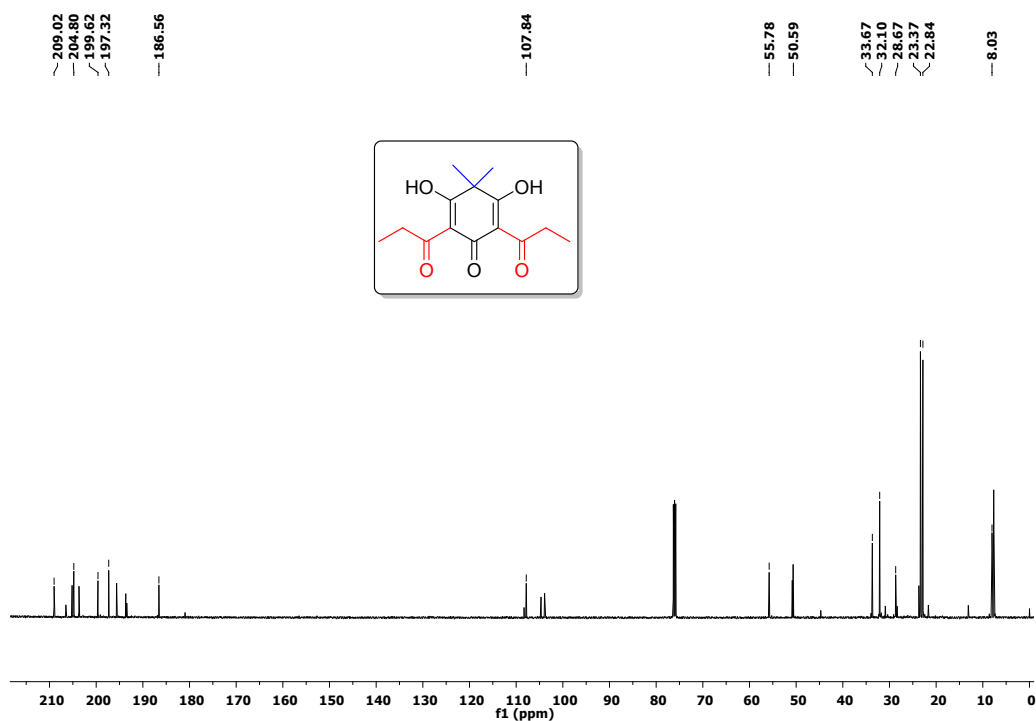

# DEPT

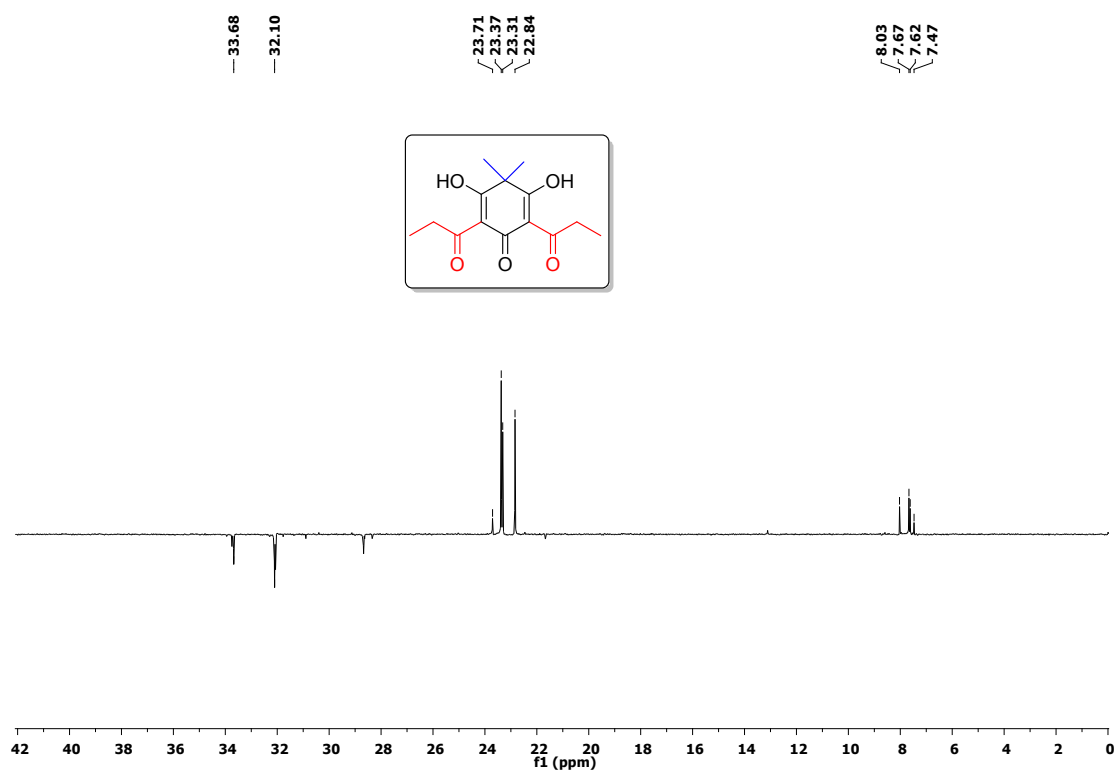

S1.v.  $^1\text{H}$ ,  $^{13}\text{C}$  and DEPT-135 NMR spectrum of 4,4-diallyl-3,5-dihydroxy-2,6-dipropionylcyclohexa-2,5-dienone (**5e**)

$^1\text{H}$  NMR

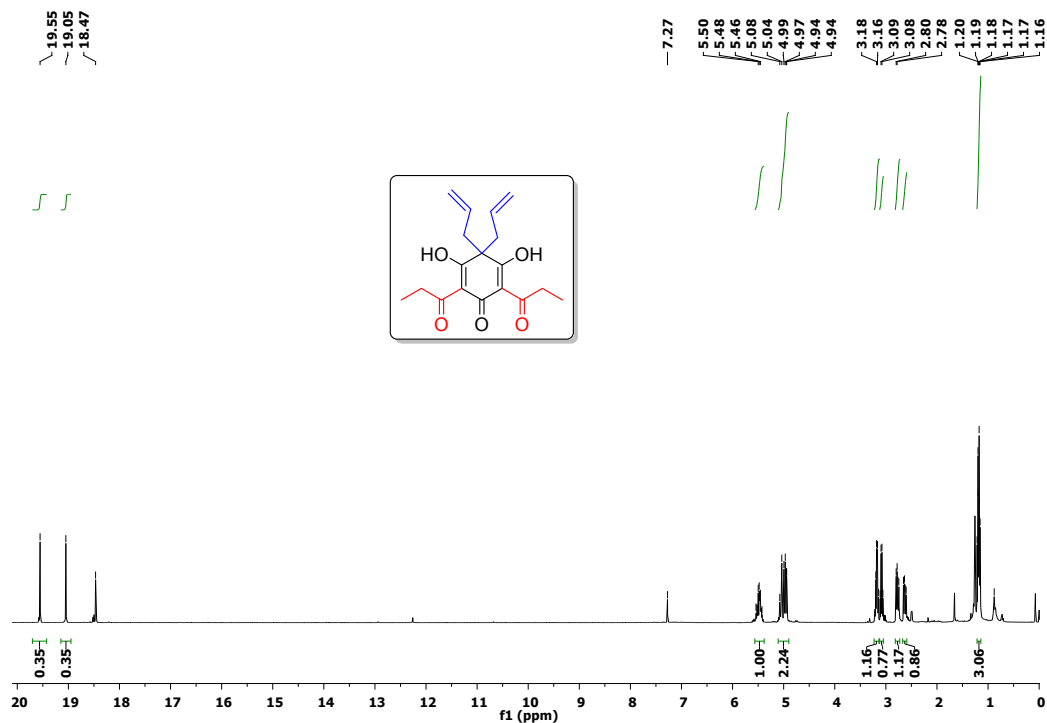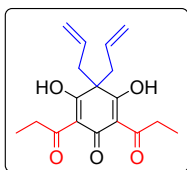

$^{13}\text{C}$  NMR

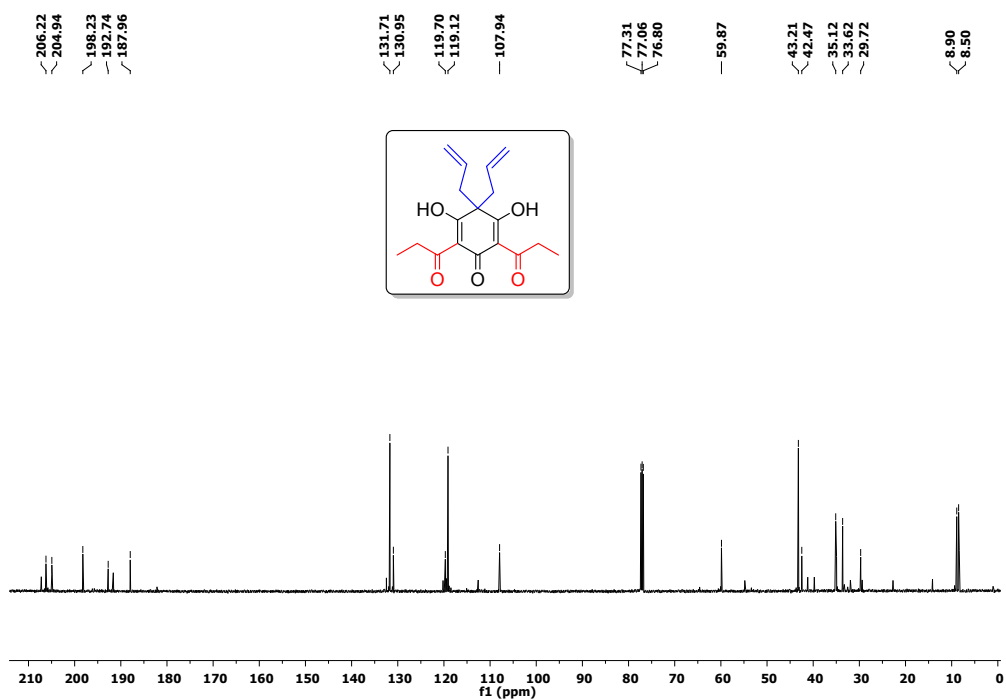

# DEPT

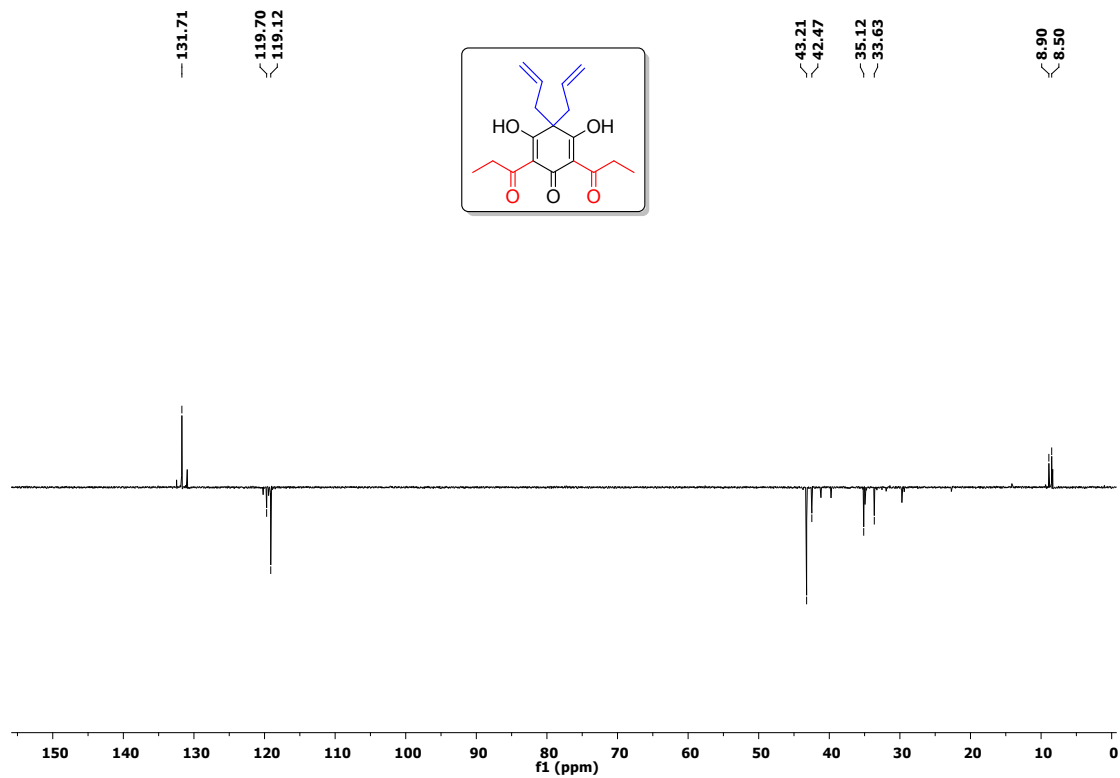

S1.w.  $^1\text{H}$ ,  $^{13}\text{C}$  and DEPT-135 NMR spectrum of 3,5-dihydroxy-4,4-bis(3-methylbut-2-enyl)-2,6-dipropionylcyclohexa-2,5-dienone (**5f**)

$^1\text{H}$  NMR

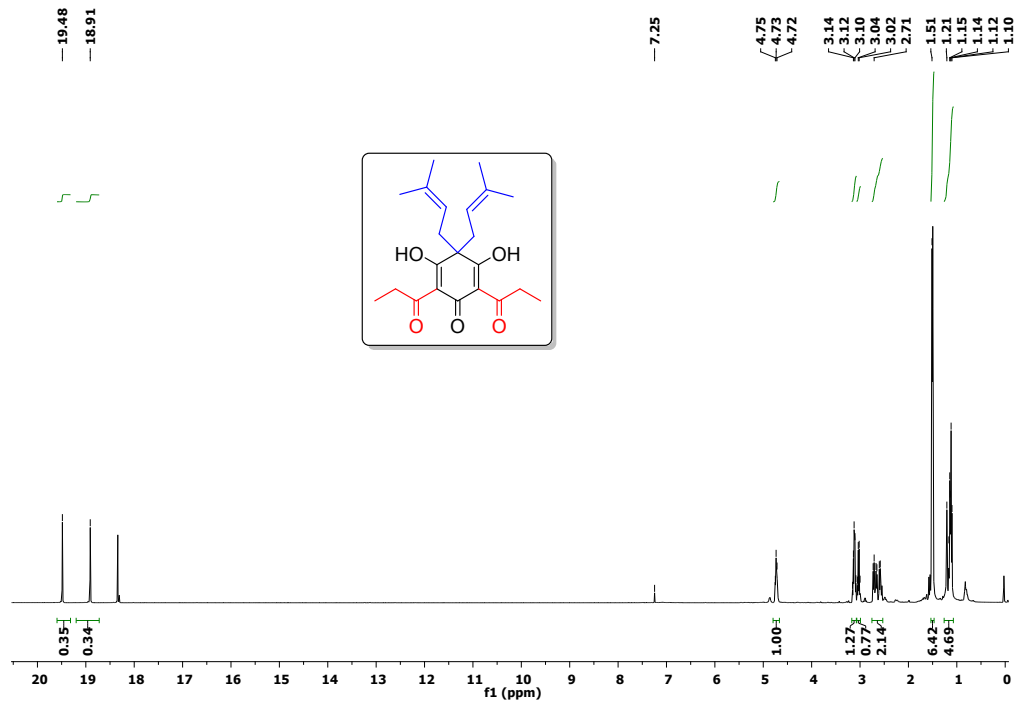

$^{13}\text{C}$  NMR

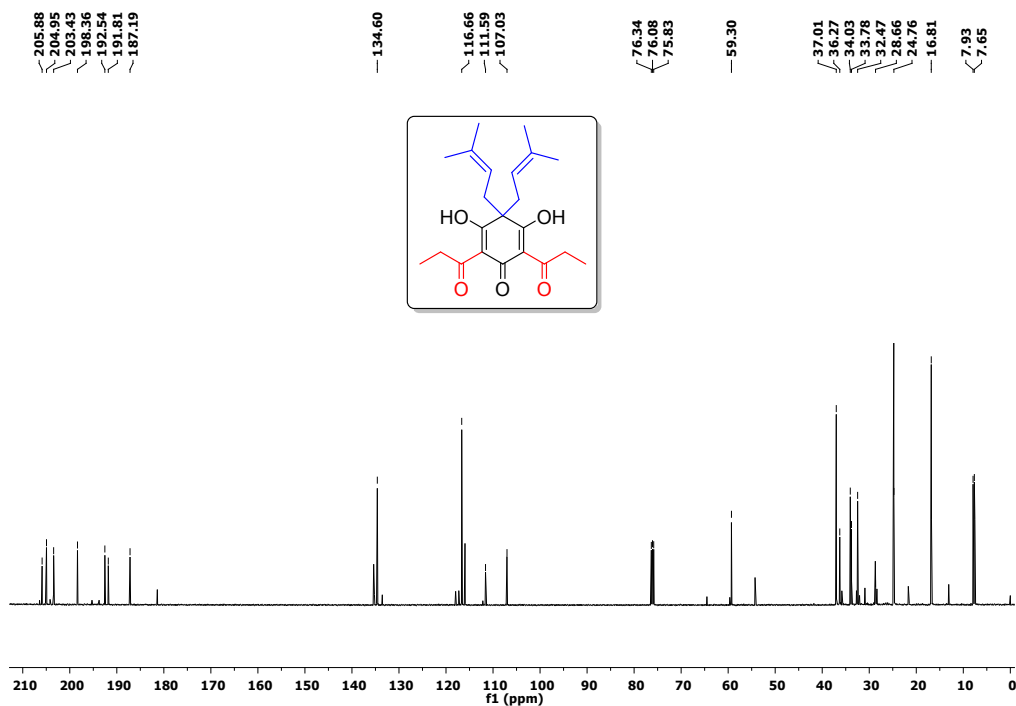



# DEPT

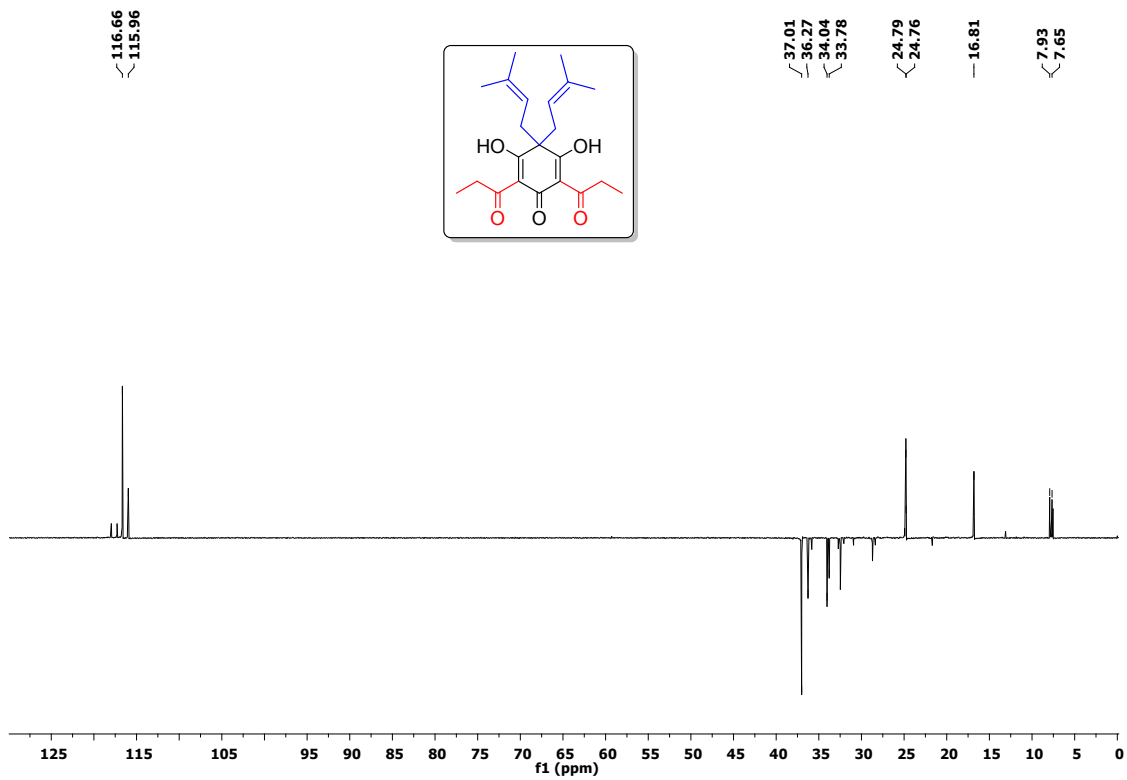

**S1.x.**  $^1\text{H}$ ,  $^{13}\text{C}$  and DEPT-135 NMR spectrum of 1,1'-(4,6-dihydroxy-5,5-dimethyl-2-oxocyclohexa-3,6-diene-1,3-diyl) bis (3-methylbutan-1-one) (**5g**)

**$^1\text{H}$  NMR**

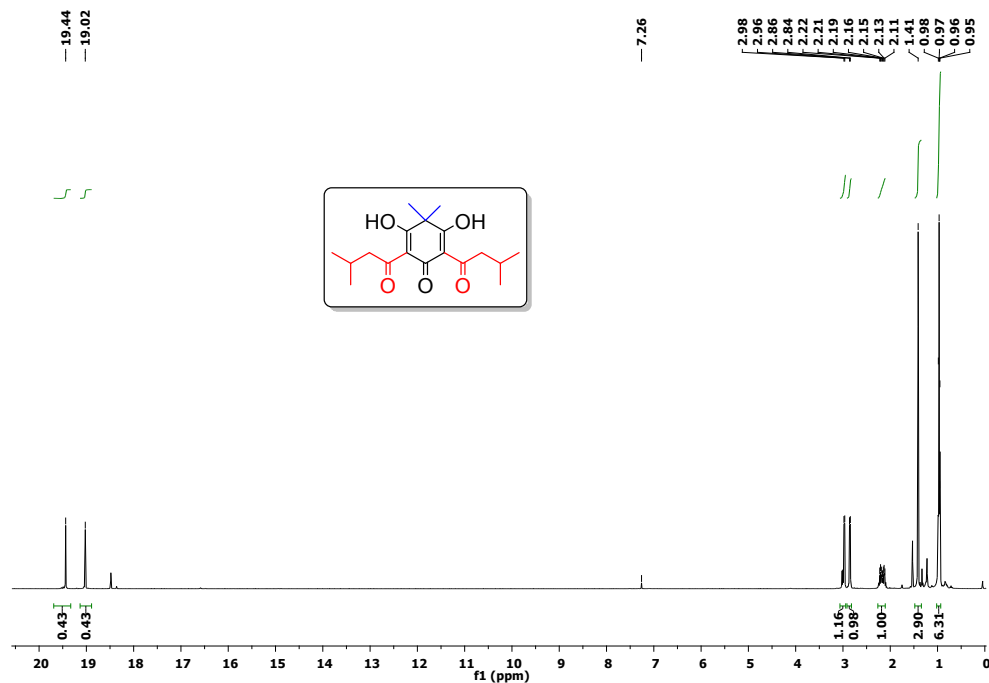

**$^{13}\text{C}$  NMR**

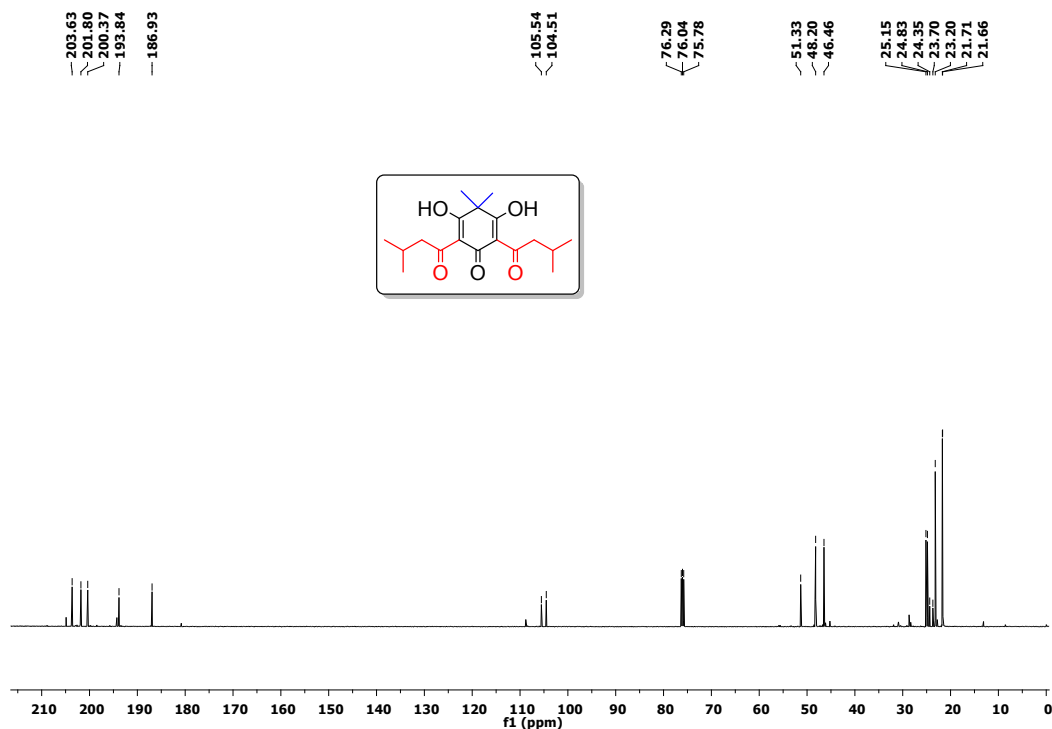

# DEPT

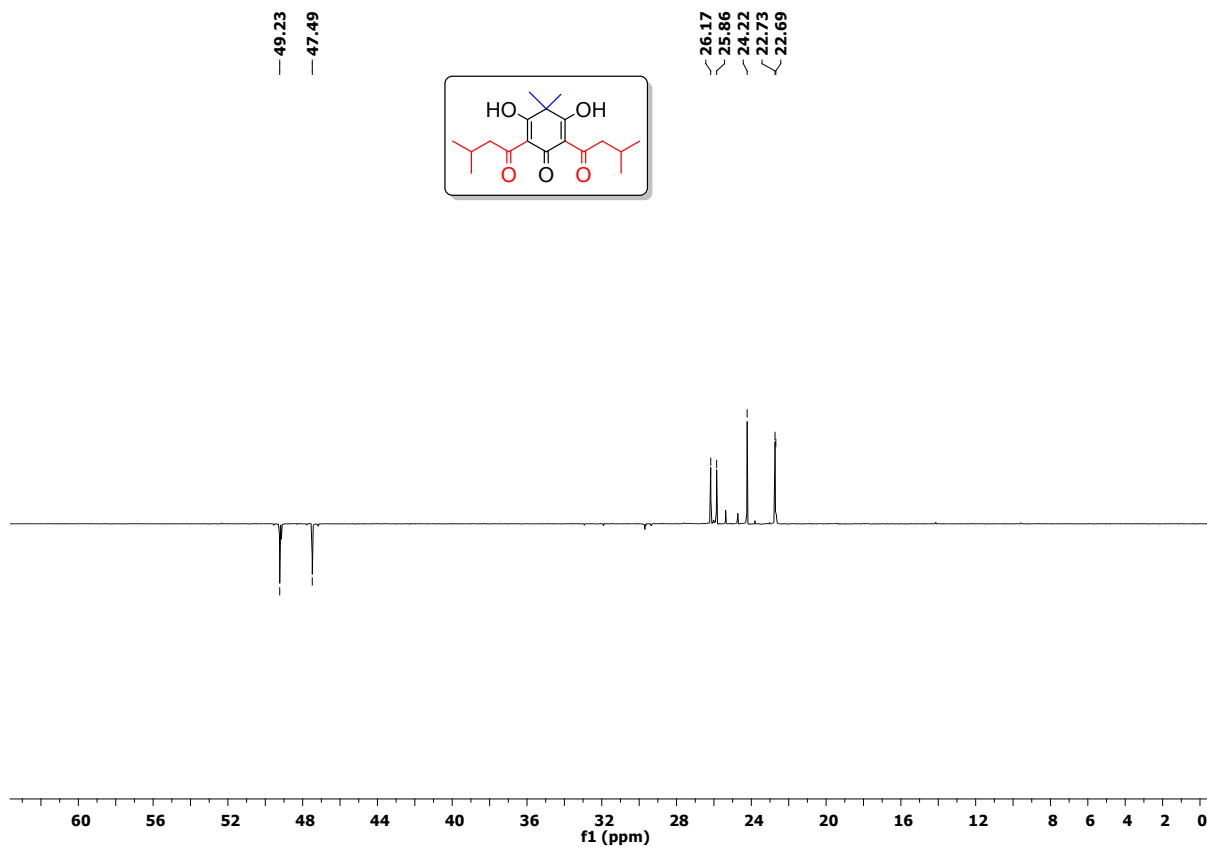

**S1.y.**  $^1\text{H}$ ,  $^{13}\text{C}$  and DEPT-135 NMR spectrum of 2,6-bis(3-methylbutanoyl)-4,4-diallyl-3,5-dihydroxycyclohexa-2,5-dienone (**5h**)

**$^1\text{H}$  NMR**

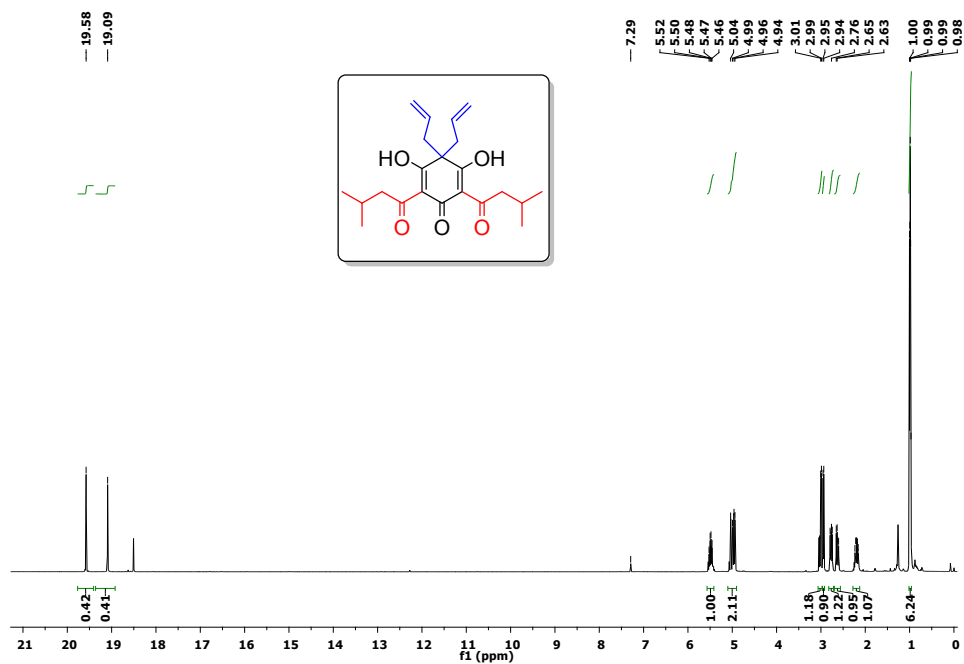

**$^{13}\text{C}$  NMR**

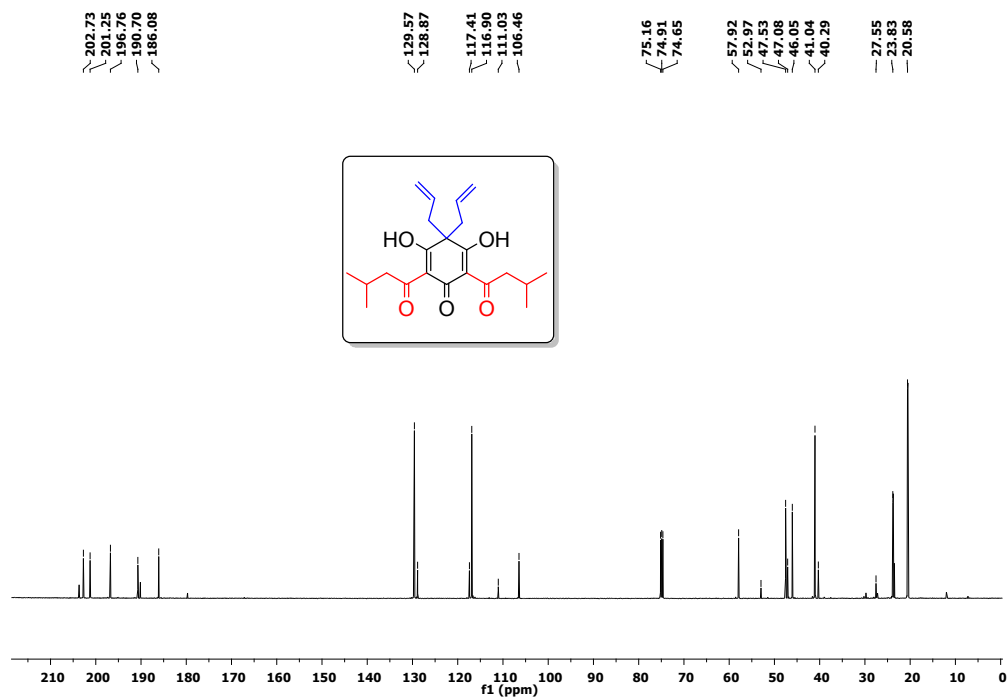

# DEPT

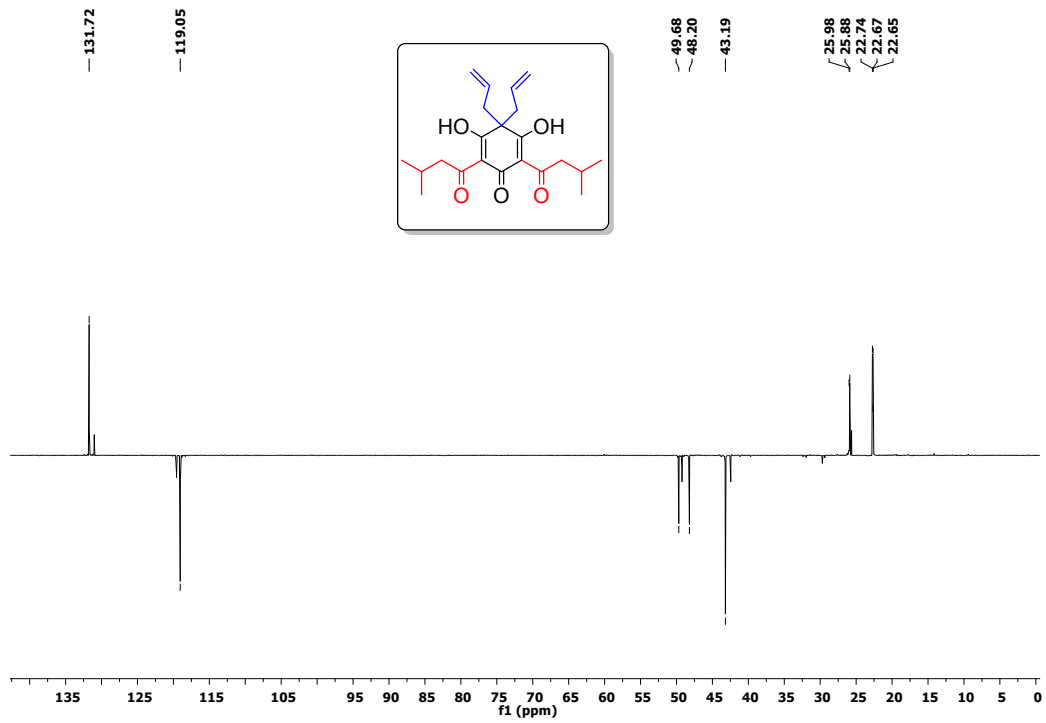

**S1.z.**  $^1\text{H}$ ,  $^{13}\text{C}$  and DEPT-135 NMR spectrum of 2,6-bis(3-methylbutanoyl)-3,5-dihydroxy-4,4-bis(3-methylbut-2-enyl)cyclohexa-2,5-dienone (**5i**)

$^1\text{H}$  NMR

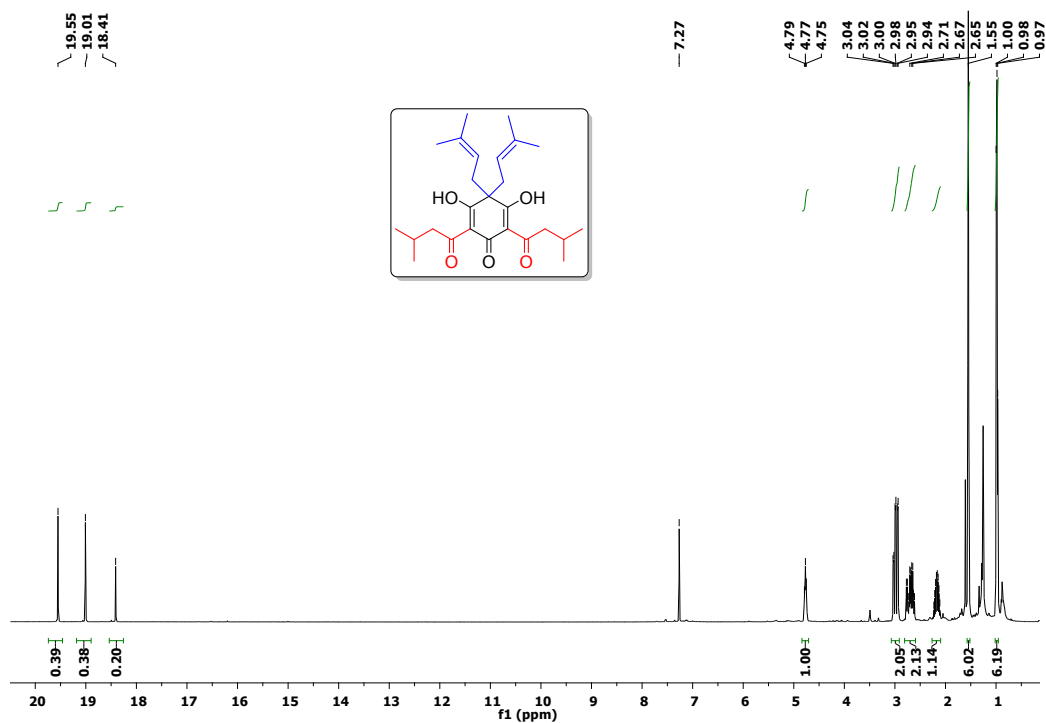

$^{13}\text{C}$  NMR

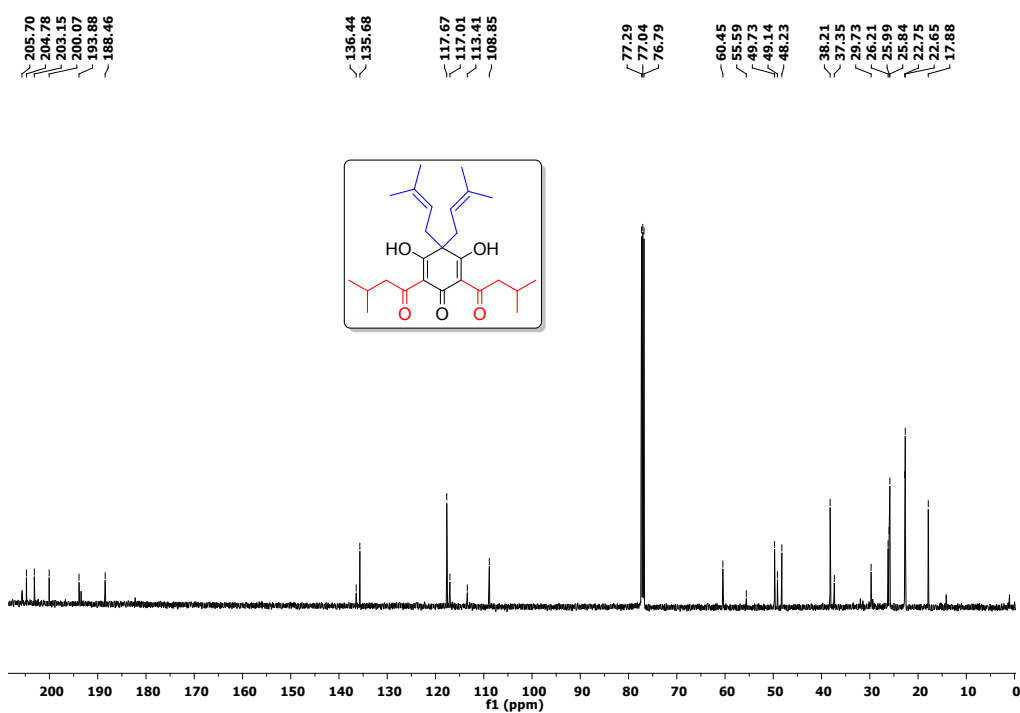

# DEPT

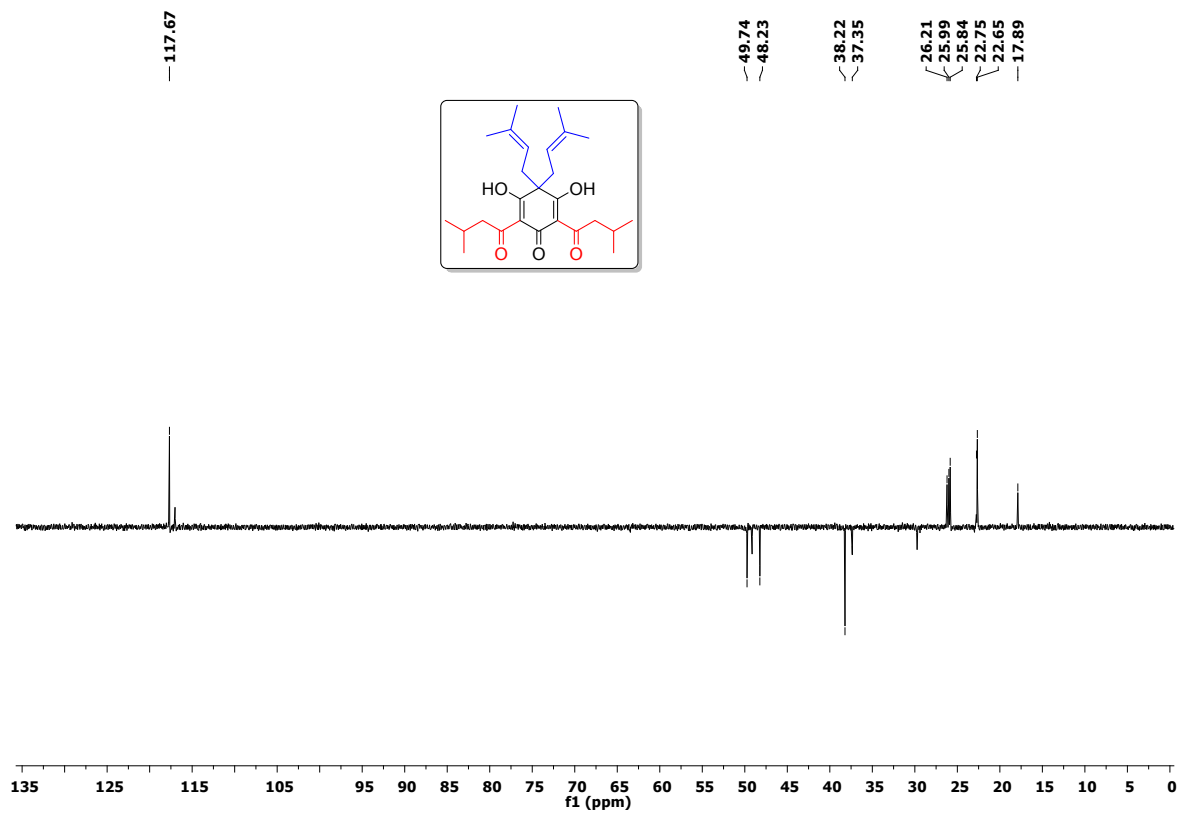

**S2.a.**  $^1\text{H}$ ,  $^{13}\text{C}$  and DEPT-135 NMR spectrum of 2,6-bis(3-methylbutanoyl)-3,5-dihydroxy-4,4-bis((E)-3,7-dimethylocta-2,6-dienyl)cyclohexa-2,5-dienone (**5j**)

**$^1\text{H}$  NMR**

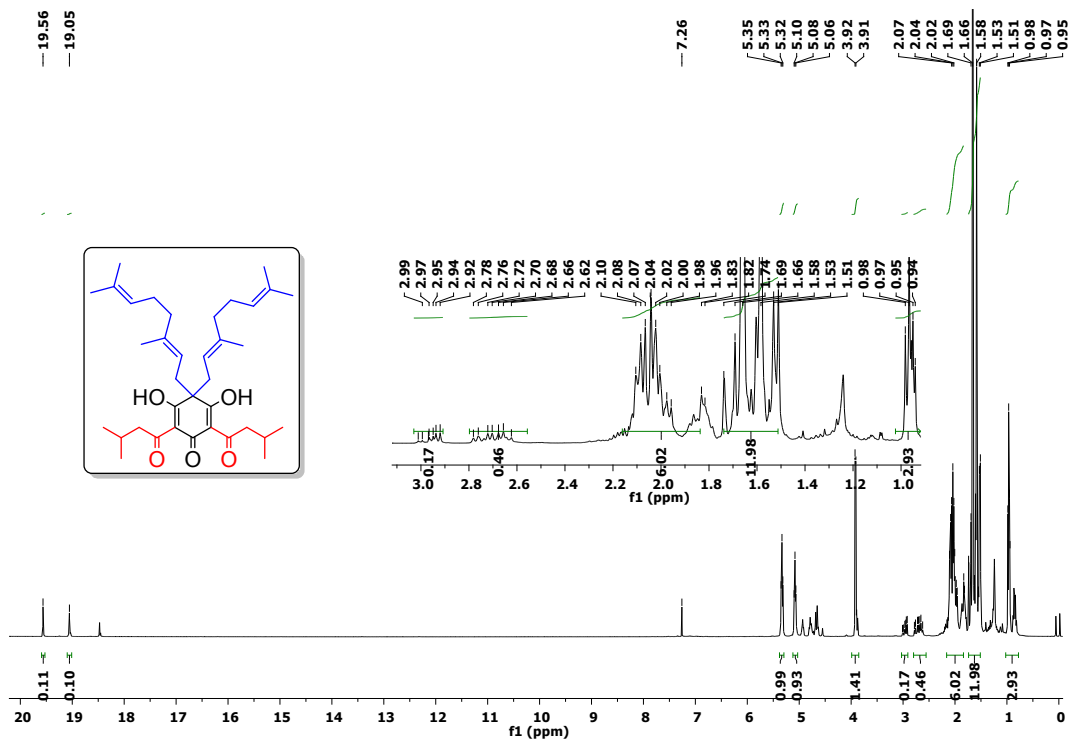

**$^{13}\text{C}$  NMR**

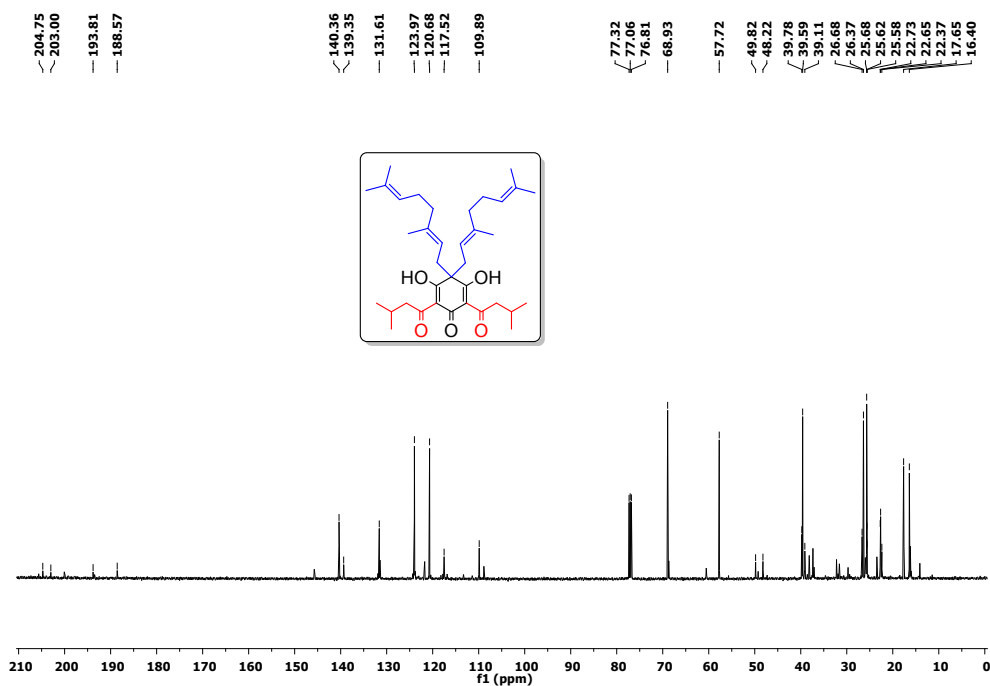



# DEPT

123.97  
123.83  
120.67  
117.52

57.72  
49.82  
48.22  
39.78  
39.59  
38.15  
37.35  
26.67  
26.37  
25.68  
22.72  
22.64  
17.65  
16.40

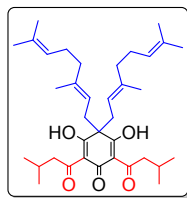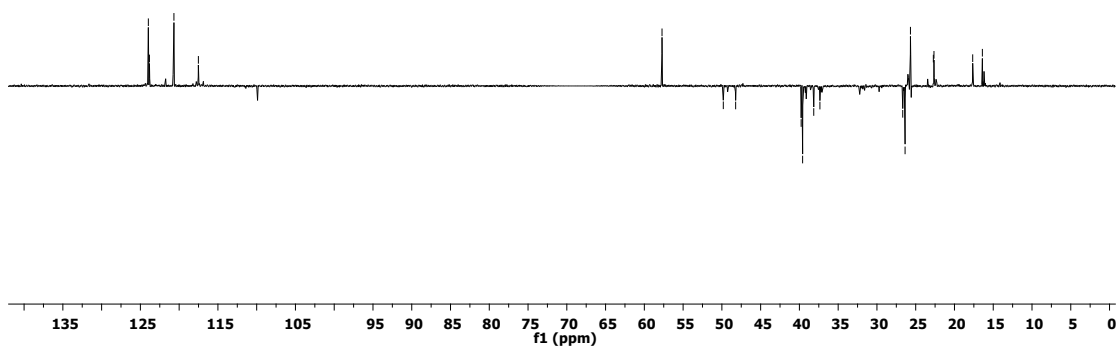

Supplement: c5ob00554j1.pdf [file c5ob00554j1.pdf]
